1 **A photo-switchable assay system for dendrite degeneration and repair in *Drosophila***  
2 ***melanogaster***

3

4 Han-Hsuan Liu<sup>1</sup>, Chien-Hsiang Hsu<sup>2</sup>, Lily, Y. Jan<sup>1</sup> and Yuh-Nung Jan<sup>1</sup>

5

6 1. Howard Hughes Medical Institute, Departments of Physiology, Biochemistry and Biophysics,  
7 University of California, San Francisco, San Francisco, CA, United States.

8 2. Department of Pharmaceutical Chemistry, University of California, San Francisco, San  
9 Francisco, CA, United States.

10

11 **ABSTRACT**

12 Neurodegeneration arising from aging, injury or disease has devastating health consequences.  
13 Whereas neuronal survival and axon degeneration have been studied extensively, much less is  
14 known about how neurodegeneration impacts dendrites. To develop an assay for dendrite  
15 degeneration and repair in the *Drosophila* peripheral nervous system, we used photo-switchable  
16 caspase-3 (caspase-LOV) to induce neuronal damage with tunable severity by adjusting  
17 illumination duration, thereby revealing cell type-specific responses to caspase-3 induced dendrite  
18 degeneration in dendrite arborization (da) neurons. To ask whether mechanisms underlying axon  
19 degeneration also govern dendrite degeneration, we tested the involvement of the Wallerian  
20 degeneration pathway by examining the effects of expressing the mouse Wallerian degeneration  
21 slow (Wld<sup>S</sup>) protein and knockdown of the *Drosophila* sterile alpha/Armadillo/Toll-Interleukin  
22 receptor homology domain protein (dSarm1) and Axundead (Axed) in class 4 da neurons. Here  
23 we report Wld<sup>S</sup> expression or knockdown of dSarm1 improved dendrite repair following caspase-  
24 3 induced dendrite degeneration. Whereas both dSarm1 and Axed were required for thermal  
25 nocifensive behavior in uninjured animals, Wld<sup>S</sup> expression improved the recovery of thermal  
26 nocifensive behavior that was impaired by chronic low-level of caspase-LOV activity. By  
27 establishing ways to induce graded dendrite degeneration, we uncover a protective role of Wld<sup>S</sup> in  
28 caspase-3 induced dendrite degeneration and repair.

29

30

31

## 32 **INTRODUCTION**

33 Neurodegeneration may cause disabilities that place tremendous burdens on both patients and  
34 society at large. While much progress has been made in the study of neuronal survival and axon  
35 degeneration, it remains an open question as to how dendrites respond to injuries or  
36 neurodegeneration. Dendrite degeneration may result from neurological disorders, traumatic brain  
37 injury, aging, and other insults (Kulkarni and Firestein, 2012; Kweon et al., 2017; Mulherkar et  
38 al., 2017; Penzes et al., 2011; Xiong et al., 2019). These deleterious changes in dendrite structures  
39 impair how neurons receive and process information, likely causing major deficits to neurological  
40 function (Mulherkar et al., 2017; Penzes et al., 2011). Elucidating the underlying mechanisms of  
41 dendrite degeneration and repair will help to uncover ways to reduce damage and facilitate  
42 recovery and thus has important clinical implications. Physiologically relevant and reliable *in vivo*  
43 injury models are key to better understanding how dendrite degeneration may be reduced and to  
44 what extent dendrites are capable of repair.

45 *Drosophila* dendrite arborization (da) neurons are well suited for studying dendrite  
46 development, degeneration, and repair. They are sensory neurons in the body wall and the  
47 confinement of their dendrites in a primarily two-dimensional space is conducive to live imaging  
48 (Jan and Jan, 2010). Based on the dendrite arbor complexity, da neurons are grouped into four  
49 classes with class 4 da (c4da) neurons displaying the most complex dendrite arbors (Grueber et al.,  
50 2002). Da neurons can sense and initiate response to different harmful sensory modalities. For  
51 example, c4da neurons can detect high temperature, harsh mechanical stimulation, noxious  
52 chemicals, and harmful short wave-length light (Gorczyca et al., 2014; Hwang et al., 2012; Kim  
53 et al., 2012; Xiang et al., 2010; Zhong et al., 2010), whereas class 3 da (c3da) neurons are  
54 specialized for sensing gentle mechanical stimulation (Yan et al., 2013). The behavioral readouts  
55 of da neurons, such as the fast crawling and rolling escape behaviors initiated by c4da neurons  
56 upon high temperature, are well-characterized and can be used for assessments of functional  
57 recovery (Babcock et al., 2009; Hwang et al., 2007). Studies that use laser ablation to sever  
58 dendrites from the c4da, c3da and c1da neuron somata have shown that dendrites can repair  
59 themselves. The repair process depends on kinases, electrical activity, extracellular environment,  
60 microRNA, and kinetochore proteins (DeVault et al., 2018; Hertzler et al., 2020; Kitatani et al.,  
61 2020; Nye et al., 2020; Song et al., 2012; Stone et al., 2014; Thompson-Peer et al., 2016). However,  
62 the harsh injury caused by dendrite severing is likely more severe and drastic as compared to insults

63 induced by neurological disorders, traumatic brain injury, aging, and other insults. Moreover, laser  
64 ablation is labor-intensive and hence not suitable for high-throughput screening designed to  
65 uncover novel mechanisms. In order to gain insights on how dendrites degenerate and repair, it is  
66 desirable to develop an alternative neurodegeneration model that can better simulate how a neuron  
67 responds to the insults that it may encounter in its lifetime.

68 Many conditions can induce neurodegeneration. In this study, we used caspase-3, which  
69 acts downstream of various insults, as a switch to initiate neurodegeneration. Activation of  
70 caspase-3, an executor for apoptotic cell death, has been observed in neurons exposed to insults  
71 such as injury, neurotoxins, and neurodegenerative diseases (Cotman and Su, 1996; Eldadah and  
72 Faden, 2000). There are also circumstances where, following caspase-3 activation, neurons stay  
73 alive and display degeneration or partial remodeling in dendrites or axons (Erturk et al., 2014;  
74 Khatri et al., 2018; Kuo et al., 2006; Simon et al., 2016; Williams et al., 2006). These observations  
75 suggest that caspase-3 could be used as a way to introduce damage on dendrites systematically to  
76 elicit neurodegeneration. A recently developed photo-switchable caspase-3, caspase-LOV,  
77 provides opportunities to test whether a controllable caspase-3 could be a versatile tool to induce  
78 neurodegeneration with diverse outcomes ranging from apoptosis to repair (Smart et al., 2017). In  
79 this system, a light-oxygen-voltage-sensing domain (LOV domain) is inserted into the intersubunit  
80 linker of human caspase-3 (Smart et al., 2017). Illumination with 450 nm light activates this photo-  
81 switchable caspase-3, and the activation only lasts for the duration of illumination. This reversible  
82 feature of caspase-LOV makes it possible to adjust the degree of caspase-3 activity during a  
83 specific time window (Smart et al., 2017).

84 Wallerian degeneration is an evolutionarily conserved process to clear distal axons after  
85 axon injury. This process can be delayed by neuronal expression of the mouse Wallerian  
86 degeneration slow (Wld<sup>S</sup>) protein in both mice and flies (Hoopfer et al., 2006; Lunn et al., 1989;  
87 MacDonald et al., 2006). Wld<sup>S</sup> can also partially protect axon degeneration following trophic  
88 deprivation and dendrite pruning during metamorphosis, both of which are caspase-3 dependent  
89 (Schoenmann et al., 2010; Tao and Rolls, 2011). Caspase-3 independent dendrite degeneration  
90 induced by injury or phosphatidylserine (PS) exposure could be delayed with Wld<sup>S</sup> as well (Ji et  
91 al., 2021; Sapor et al., 2018). Interestingly, a study using both mouse and *Drosophila* models raises  
92 the possibility that Wld<sup>S</sup> and caspase act in parallel during dendrite pruning, because Wld<sup>S</sup> does  
93 not suppress caspase activity (Schoenmann et al., 2010). Loss-of-function mutations in *Drosophila*

94 Toll receptor adaptor proteins, the sterile alpha/Armadillo/Toll-Interleukin receptor homology  
95 domain protein (dSarm1) and Axundead (Axed), both of which are involved in the Wallerian  
96 degeneration pathway, afford protection for axon degeneration induced by injury but not axon  
97 degeneration during developmental pruning or apoptotic cell death (Neukomm et al., 2017;  
98 Osterloh et al., 2012). The suppression of injury-induced axon degeneration can be achieved by  
99 knocking down expression of dSarm1 with RNAi as well (Gerds et al., 2013). Deletion of dSarm1  
100 protects injury- and PS-induced dendrite degeneration (Ji et al., 2021), whereas deletion of Axed  
101 only partially protects the injury-induced dendrite degeneration but does not affect PS-induced  
102 dendrite degeneration (Ji et al., 2021). It is unclear whether these proteins involved in the Wallerian  
103 degeneration pathway play any roles in caspase-3 dependent dendrite degeneration and repair.

104 To elucidate the cellular mechanism of dendrite degeneration and repair, we used the  
105 photo-switchable caspase-3 to induce varying degrees of dendrite degeneration in *Drosophila*  
106 larval da neurons and monitored the repair process afterward. We found that the caspase-3  
107 dependent dendrite degeneration in da neurons was worsened by prolonging the illumination, and  
108 dendrite repair was evident with attenuated activation of caspase-3. We observed cell type-specific  
109 responses to caspase-3 induced dendrite degeneration in da neurons. Expression of mouse Wld<sup>S</sup> in  
110 c4da neurons resulted in longer and more numerous dendrites during caspase-3 induced dendrite  
111 degeneration and during development as well. Similarly, knockdown of dSarm1 or Axed, two  
112 factors involved in Wallerian degeneration, increased survival of neurons following caspase-LOV  
113 activation. Additionally, knockdown of dSarm1 led to longer dendrites both during development  
114 and following caspase-LOV activation. Reduced expression of Axed did not affect the dendrite  
115 structure during development or following caspase-LOV activation. We further showed that the  
116 compromised thermal nocifensive behavior caused by chronic low-level of caspase-LOV activity  
117 in c4da neurons can be partially rescued with Wld<sup>S</sup> expression but not with knockdown of dSarm1  
118 or Axed.

119

## 120 **RESULTS**

### 121 **Caspase-LOV activation of different durations initiates graded dendrite degeneration in** 122 **sensory neurons**

123 Among larval da neurons, c4da neurons display the most complex dendrite structures (Grueber et  
124 al., 2002). Their dendrites actively grow in length, scale in size to extend coverage area, and

125 continue adding new tips throughout larval development (Grueber et al., 2002; Parrish et al., 2009;  
126 Williams and Truman, 2005). In this study, we sought to determine to what extent c4da neurons  
127 can recover from caspase-3 induced degeneration following transient activation of a photo-  
128 switchable caspase-3, caspase-LOV. The amount of illumination is known to correlate with the  
129 amount of caspase-3 activity which can effectively induce dendrite degeneration followed by  
130 apoptosis in several type of cells including c4da neurons (Smart et al., 2017).

131 Given that the activation of caspase-LOV can be easily controlled by adjusting the intensity  
132 and the duration of illumination, we began our study by monitoring dendrite degeneration  
133 following caspase-LOV activation for 2 hours (h), 30 minutes (min), or 10 min. We used a  
134 membrane tethered tdTomato (UAS-CD4-tdTOM) driven by the ppk-GAL4 to label the plasma  
135 membrane of c4da neurons for visualization of individual dendrite arbors. Freely moving larvae  
136 were illuminated for various durations at 48 h after egg laying (AEL) on transparent agar plates  
137 and then transferred back to a dark environment. We performed time-lapse imaging to monitor the  
138 dendrite structure of the same c4da neuron, ddaC, 24 h and 72 h following illumination with blue  
139 LED (**Figure 1A**). The 24 h and 72 h imaging timepoints provide snap shots for the early and late  
140 stages of caspase-3 induced dendrite degeneration and subsequent repair, as indications for the  
141 acute and continuing response to the degeneration, respectively.

142 To facilitate the quantification of complex morphology of c4da neurons in this study, we  
143 built a deep learning model based on the U-Net architecture (Ronneberger et al., 2015) which has  
144 been widely used for biomedical image segmentation, including detecting dendrite branch  
145 terminals of da neurons (Kanaoka et al., 2019). We applied our model to automatically segment  
146 dendrite structure from microscopy images and retrieve segmentation masks containing the full  
147 reconstruction of the dendrite arbors of neurons. Segmentation masks of individual neurons were  
148 then used to measure different parameters of neuronal morphology, including total dendrite length,  
149 total dendrite tip numbers, percentage of territory covered, and dendrite complexities assessed with  
150 Sholl analysis. We validated that the dendrite structures segmented by our model and found that  
151 they were comparable to manual reconstruction and achieved high Dice coefficient, a commonly  
152 used spatial overlap index for evaluating segmentation quality (Zou et al., 2004) (**Figure 1 – figure  
153 supplement 1A**). To further evaluate the model performance, we compared parameters of neuronal  
154 morphology measured from model-predicted segmentation with those derived from manual  
155 reconstruction by using the images of c4da neurons acquired in Figure 1. With post-processing to

156 fill in gaps and remove small fragments (see Methods), we observed high correlation for both tip  
157 numbers ( $R^2 = 0.97$ ) and total dendrite length ( $R^2 = 0.99$ ; **Figure 1 – figure supplement 1B,C**).

158 Caspase-LOV activation lasting longer than 2 h induced apoptosis within 72 h (**Figure**  
159 **1B,C**). Shortening the caspase-LOV activation to 30 min allowed the average survival rate for  
160 illuminated neurons to reach 80%. With 10 min caspase-LOV activation, almost all neurons  
161 survived for at least 72 h (**Figure 1C**). Using the deep learning-based model, we quantified the  
162 dendrite structures of c4da neurons that were either kept in the dark or illuminated for a duration  
163 ranging from 10 min to 2 h. Activation of caspase-LOV for 2 h caused the reduction of total  
164 dendrite length, tip numbers, dendrite complexity, and percentage of territory covered, both at 24  
165 h and at 72 h following caspase-LOV activation (**Figure 1B,D,E,F,G,H**). The total dendrite length,  
166 tip numbers, and dendrite complexity decreased progressively with increasing durations of  
167 illumination, while the percentage of territory covered was affected at 72 h after 30 min  
168 illumination (**Figure 1B,D,E,F,G,H**). Neurons exposed to 30 min of blue LED illumination  
169 displayed significantly shorter and fewer dendrites compared to those exposed to 10 min  
170 illumination. The basal activity of caspase-LOV in the dark (dark) led to reduced dendrite arbor  
171 length, tip numbers, and dendrite complexity at the 24 h and 72 h timepoints compared to the  
172 animals without caspase-LOV expression (control) (**Figure 1B,D,E,G,H**). The percentage of  
173 territory covered by dendrites is not affected by caspase-LOV expression if the animals were kept  
174 in the dark (**Figure 1F**). With 30 min and 2 h of caspase-LOV activation, there were overall  
175 reductions in both dendrite length and tip numbers (**Figure 2A,B**). Interestingly, there were still  
176 increases in the dendrite length 24-72 h after the 10 min illumination (**Figure 2A**), even though  
177 the total dendrite tip numbers were reduced (**Figure 2B**), suggesting that c4da neurons can  
178 continue to grow after experiencing caspase-LOV activation. These changes could be a  
179 combination of normal dendrite growth, dendrite degeneration, and repair.

180 To further examine the dendrite elimination and addition of c4da neurons, we analyzed the  
181 dendrite dynamics in the tip numbers over a period of 48 h following caspase-LOV activation. We  
182 compared the dendrite structure between the 24 h and 72 h timepoints and used the dendrite arbor  
183 at 24 h following illumination as the backbone to generate a “transition state arbor” which  
184 contained only dendrites observed at both 24 h and 72 h. Then, we subtracted the number of tips  
185 of the “transition state arbor” from that at 24 h to give a measure of the eliminated dendrites (those  
186 dendrite branches only observed at 24 h), and from that at 72 h to give a measure of the newly

187 added branches (those dendrite branches only observed at 72 h) (*Figure 2C*). The percentage of  
188 eliminated dendrite tips was calculated by dividing the number of eliminated dendrites by the total  
189 number of dendrite tips measured at 24 h. The percentage of added dendrite tips was calculated by  
190 dividing the number of newly added dendrites by the total number of dendrite tips measured at 72  
191 h.

192 We found that dendrite elimination and addition took place concurrently in individual  
193 neurons following caspase-LOV activation (*Figure 2D,E*). As the duration of Caspase-3  
194 activity increased, the percentage of eliminated dendrite tips increased and the percentage of added  
195 dendrite tips decreased. Interestingly, even though caspase-LOV activation for 30 min caused  
196 reduction in total dendrite length and tip numbers, there were still new branches added following  
197 dendrite degeneration. The reduction in total tip numbers following 10 min or 30 min illumination  
198 (*Figure 2B*) resulted from the significantly greater increase in elimination (*Figure 2D*) than  
199 addition of dendrite branches (*Figure 2E*). C4da neurons expressing caspase-LOV but kept in the  
200 dark were comparable with c4da neurons not expressing caspase-LOV based on the percentage of  
201 eliminated dendrite tips (*Figure 2D*) though the former had a higher percentage of newly added  
202 dendrites (*Figure 2E*).

203 Taken together, we found that neurons can survive 10-30 min of caspase-LOV activation  
204 through illumination, and their dendrites continue to grow in length with addition of new tips to  
205 the remaining dendrite arbors. Most of the neurons failed to survive following caspase-LOV  
206 activation for longer than 2 h and showed severe dendrite degeneration before dying. By making  
207 use of the varying levels of degeneration induced by different durations of illumination, we can  
208 search for machineries used for neuroprotection to improve dendrite degeneration, repair or  
209 neuronal survival following caspase-3 induced degeneration.

210

### 211 **Class I da neurons can withstand transient caspase-LOV activation and repair dendrite** 212 **damage**

213 Class I da (c1da) neurons and class 3 da (c3da) neurons differ from c4da neurons in dendritic  
214 morphology, growth dynamics and physiological function. To ask whether their response to  
215 caspase-3 induced regeneration and repair is also different from that of c4da neurons, we first  
216 examined c1da neurons, which have the simplest dendrite arbor among all classes of da neurons.  
217 C1da neurons establish their dendrite arbor early in development and only extend existing branches

218 in length without adding new branches in late larval development (Grueber et al., 2002; Williams  
219 and Truman, 2005). They are able to initiate regeneration after dendrotomy as are c4da neurons  
220 (Sugimura et al., 2003; Tao and Rolls, 2011; Thompson-Peer et al., 2016).

221 To assess how c1da neurons would react to caspase-3 induced degeneration, we labeled  
222 the c1da ddaE neuron with UAS-CD4-tdTOM driven by the GAL4<sup>2-21</sup> (Grueber et al., 2003a) and  
223 used the same paradigm described in **Figure 1A**. C1da neurons can survive 30 min activation of  
224 caspase-LOV, whereas about 10% of c1da neurons imaged were found dead 72 h following  
225 caspase-LOV activation for 2 h (**Figure 3A,B**). Caspase-LOV activity in the dark (dark)  
226 significantly reduced dendrite length at 72 h after illumination (**Figure 3C**). The dendrite tip  
227 numbers of c1da neurons expressing caspase-LOV and maintained in the dark (dark) were fewer  
228 than those of c1da neurons without caspase-LOV expression (control) (**Figure 3D**). Both 30 min  
229 and 2 h caspase-LOV activation impaired dendrite structures (**Figure 3A,C,D**). Caspase-LOV  
230 activation for 2 h induced more drastic reductions in both total dendrite length and tip numbers at  
231 72 h after illumination, as compared to 30 min of caspase-LOV activation (**Figure 3A,C,D**). The  
232 increase in dendrite length (**Figure 3E**) and total tip numbers (**Figure 3F**) over the 24-72 h period  
233 following 2 h of caspase-LOV activation was significantly less than dark and 30 min of caspase-  
234 LOV activation.

235 We next looked into the dendrite dynamics and quantified dendrite tip elimination and  
236 addition as we did for c4da neurons. Similar to previous reports on the limited increase in dendrite  
237 tips after early development (Stone et al., 2014; Sugimura et al., 2003), we found that the c1da  
238 ddaE neurons without caspase-LOV (control) had 7% and 4% tips added and eliminated,  
239 respectively (**Figure 3F,G**). Caspase-LOV activity in the dark did not significantly alter the  
240 percentage of addition or elimination of dendrite tips. Caspase-LOV activation for 30 min or 2 h  
241 increased the percentage of eliminated dendrite tips (**Figure 3G**). There was a robust increase in the  
242 percentage of added dendrite tips of c1da neurons expressing caspase-LOV following 30 min  
243 illumination compared to those kept in the dark (**Figure 3H**). This robust increase in the percentage  
244 of added dendrite tips was not observed in c1da neurons following 2 h illumination nor in c4da  
245 neurons following any durations of illumination tested in this study (**Figure 2E** and **Figure 3H**).  
246 Thus, there appears to be a regrowth program unique for c1da neurons that is initiated following  
247 30 min caspase-LOV activation – a program that is not evident following severe degeneration  
248 induced by 2 h caspase-LOV activation.



249

250 **Class III ddaE neurons can withstand transient caspase-LOV activation induced dendrite**  
251 **damage**

252 C3da neurons have signature bushy tertiary branches enriched in actin (Nagel et al., 2012;  
253 Tsubouchi et al., 2012). In contrast to the c4da ddaC and c1da ddaE neurons, c3da neurons do not  
254 persist after metamorphosis (Shimono et al., 2009; Williams and Truman, 2005). To test whether  
255 they can survive caspase-3 activation, we expressed caspase-LOV in the c3da ddaF neurons and  
256 imaged these neurons at 24 and 72 h after illumination. We labeled the c3da ddaF neurons with  
257 UAS-CD4-tdTOM driven by the GAL4<sup>19-21</sup> along with Repo-Gal80 to eliminate the expression in  
258 glial cells (Awasaki et al., 2008; Xiang et al., 2010). The c3da ddaF neurons can survive 30 min  
259 but not 2 h caspase-LOV activation (**Figure 4A,B**). The survival rate of c3da ddaF neurons was  
260 significantly reduced to 71% following 2 h caspase-LOV activation (**Figure 4A,B**). Caspase-LOV  
261 activity in the dark (dark) induced significant reduction in dendrite tip numbers but did not alter  
262 the total dendrite length compared to c3da neurons without caspase-LOV (control) (**Figure 4C,D**).  
263 Both 30 min and 2 h of caspase-LOV activation in c3da ddaF neurons led to reduction in total  
264 dendrite length and tip numbers (**Figure 4C,D**). Caspase-LOV activity in the dark significantly  
265 reduced the increase in dendrite length (**Figure 4E**) but did not significantly alter the dendrite tip  
266 numbers (**Figure 4F**). The dendrite length and tip numbers still exhibited increases over the 24-  
267 72 h period following 30 min or 2 h of caspase-LOV activation (**Figure 4E,F**). Moreover, there  
268 were significant increases in the percentage of eliminated tips and significant decreases in the  
269 percentage of added new tips following 2 h of caspase-LOV activation (**Figure 4G,H**). Thus, c3da  
270 ddaF neurons also appear to have a class-specific response to caspase-3 induced dendrite  
271 degeneration. They do not initiate regrowth following mild degeneration as observed in c1da ddaE  
272 neurons. Instead, there was greater degeneration of c3da neuronal dendrites following longer  
273 caspase activation, similar to what we observed in c4da neurons. The c3da ddaF neurons differ  
274 from c4da ddaC neurons in that they do not show any increase in the percentage of added dendrite  
275 tips with caspase-LOV activity in the dark (**Figure 2E** and **Figure 4H**) and they continue to grow  
276 in length and add new tips following caspase-LOV activation (**Figure 2A,B** and **Figure 4E,F**).

277

278 **Wld<sup>S</sup> protects c4da neurons from caspase-3 dependent dendrite degeneration**

279 This new degeneration assay system can be used to address questions such as how caspase-LOV  
280 activation induces dendrite degeneration, how neurons manage to survive from transient caspase-  
281 LOV activation, and how neurons repair their damaged dendrites. We decided to focus on c4da  
282 neurons because they have the most complex dendrites among the da neurons (Grueber et al., 2002)  
283 and there are established behavioral assays to assess their sensory functions (Babcock et al., 2009;  
284 Hwang et al., 2007).

285 We generated caspase-tester flies expressing the ppk-tdGFP transgene to monitor the  
286 dendrite morphology of c4da neurons with caspase-LOV expressed via ppk-GAL4. These tester  
287 flies were crossed with either RNAi flies or flies harboring other transgenes of interest. To select  
288 illumination conditions, we first examined the degree of dendrite degeneration and repair in c4da  
289 neurons labeled with ppk-tdGFP and expressing caspase-LOV and luciferase (control) via ppk-  
290 GAL4. We found that 91% of the neurons survived the 10 min illumination, and the survival rate  
291 dropped to 22% following 30 min illumination (**Figure 5 – figure supplement 1A,B**). We  
292 suspected that the lower survival rate following 30 min illumination here compared to Fig. 1 is due  
293 to the stronger ppk-Gal4 used for caspase-tester flies, which has an insertion site different from  
294 the ppk-Gal4 used in Fig. 1. The 10 min caspase-LOV activation decreased dendrite length and  
295 dendrite tip numbers at 24 h and 72 h after illumination and degeneration was worse when  
296 activation of caspase-LOV extended to 30 min (**Figure 5 – figure supplement 1A,C,D,E**). The  
297 percentage of territory covered was not affected in the neurons that survived the 10 min or 30 min  
298 illumination (**Figure 5 – figure supplement 1A,E**).

299 Wld<sup>S</sup> has been found to be beneficial for protection against injury-induced dendrite  
300 degeneration, PS-induced dendrite degeneration, and developmental dendrite pruning (Ji et al.,  
301 2021; Sapar et al., 2018; Schoenmann et al., 2010; Tao and Rolls, 2011). It is unclear whether  
302 Wld<sup>S</sup> is also involved in early dendrite development or caspase-3 dependent dendrite degeneration  
303 and repair. During early dendrite development, neurons expressing Wld<sup>S</sup> displayed mild but  
304 significant increases in total dendrite length and tip numbers with no changes in the percentage of  
305 territory covered (**Figure 5A,B,C,D**). Using the caspase-tester flies, we examined the functions of  
306 Wld<sup>S</sup> expression in caspase-3 dependent dendrite degeneration and repair. To maintain comparable  
307 expression levels of UAS-caspase-LOV driven by ppk-GAL4 in neurons with or without Wld<sup>S</sup>  
308 expression, we include UAS-mIFP-2A-HO1 transgene in the control group. The transgenic flies  
309 harboring UAS-mIFP-2A-HO1, which had a wildtype genetic background similar to that of flies

310 with UAS-Wld<sup>S</sup>, expressed monomeric infrared fluorescent proteins (IFP) and Heme Oxygenase  
311 1 Proteins (HO1) driven by Gal4. With caspase-3 induced neurodegeneration, neurons expressing  
312 Wld<sup>S</sup> were comparable to control at 24 h following illumination, but these neurons retained  
313 significantly longer dendrites and more numerous dendrite tips at 72 h following 10 min of  
314 caspase-LOV activation (**Figure 5E,F,G**). The protection in dendrite structure afforded by Wld<sup>S</sup>  
315 was already evident at 24 h following 30 min of caspase-LOV activation, as revealed by the longer  
316 dendrites and more numerous dendrite tips (**Figure 5I,K,L**). Wld<sup>S</sup> expression did not alter the  
317 percentage of territory covered following 10 min or 30 min caspase-LOV activation (**Figure**  
318 **5H,M**). With 30 min illumination, neuronal survival was enhanced by Wld<sup>S</sup> expression in c4da  
319 neurons (**Figure 5J**). These results suggest that expression of Wld<sup>S</sup> can protect c4da neurons from  
320 caspase-3 induced dendrite degeneration.

321

### 322 **Knockdown of Axed and dSarm1 are neuroprotective with dSarm1 playing a role in dendrite** 323 **degeneration and repair**

324 Besides Wld<sup>S</sup>, dSarm1 and Axed are two additional players involved in the Wallerian degeneration  
325 pathway. It is unknown how dSarm1 and Axed are involved in early dendrite development and  
326 caspase-3 dependent dendrite degeneration and repair in c4da neurons. Hence, we use ppk-GAL4  
327 to drive the expression of luciferase (control) or RNAi targeting dSarm1 or Axed in c4da neurons.  
328 During early dendrite development, knocking down dSarm1 in c4da neurons resulted in longer  
329 dendrite length without changing the dendrite tip numbers (**Figure 6A,B,C,D**). Knocking down  
330 Axed had no significant effect in early dendrite development (**Figure 6A,B,C,D**). During caspase-  
331 3 induced dendrite degeneration, neurons with reduced dSarm1 expression had longer and more  
332 numerous dendrites and a higher percentage of territory covered with dendrite at 72 h after 10 min  
333 illumination (**Figure 6E,F,G,H**). Similar effects on dendrite structure were observed at 24 h  
334 following 30 min illumination (**Figure 6I,K,L,M**). Knockdown of Axed did not affect dendrite  
335 structure following either 10 min or 30 min illumination (**Figure 6E,F,G,H,I,K,L,M**). Neurons  
336 with reduced dSarm1 or Axed expression had a higher survival rate (**Figure 6J**). These results  
337 indicate that knockdown of dSarm1 or Axed in c4da neurons can increase neuronal survival  
338 following caspase-3 induced degeneration, whereas knockdown of dSarm1 but not Axed can  
339 protect dendrite structure from caspase-3 induced degeneration. Moreover, dSarm1 is also  
340 involved in early dendrite development for regulation of dendrite elongation.

341  
342 **Wld<sup>S</sup> can partially rescue caspase 3-induced neurodegeneration and impairment of thermal**  
343 **nocifensive behavior**

344 The chronic low-level caspase-LOV activity in the dark caused mild but significant dendrite  
345 degeneration during early larval development (*Figure 1A,B,D,E,F,G,H*). This mild degeneration  
346 continued throughout development up to the stage of wandering larvae (*Figure 7A*). These c4da  
347 neurons displayed impaired dendrite structure including shorter dendrites, fewer dendrite tips, and  
348 a lower percentage of territory covered (*Figure 7A,B*). We wondered whether these neurons with  
349 dendrite degeneration can fulfill normal sensory function. As nociceptive neurons, c4da neurons  
350 are required for the aversive rolling behavior when larvae encounter nocifensive stimuli such as  
351 high temperature (Babcock et al., 2009; Hwang et al., 2007). To test whether caspase-3 induced  
352 neurodegeneration affects the neuronal function, we examined the thermal nocifensive behavior  
353 in wandering larvae kept in the dark with or without caspase-LOV expression at two nocifensive  
354 temperatures, 46°C for tests of insensitivity, and 42°C for testing hypersensitivity (Honjo et al.,  
355 2016). We measured the time it took for an individual larva to initiate the rolling behavior within  
356 20 seconds (s) of contacting the thermal probe at high temperature. We also quantified the  
357 percentage of non-responders (larvae that did not respond within 20 s). We found that larvae kept  
358 in the dark with chronic low-level caspase-LOV activity in c4da neurons took longer to initiate  
359 rolling behavior to escape the high temperature and a higher percentage of them were non-  
360 responders (*Figure 7C,D*).

361 Having found that Wld<sup>S</sup> expression in c4da neurons afforded protection from caspase-3  
362 induced dendrite degeneration, we tested for its effect on the caspase-3 induced deficiency in the  
363 thermal nocifensive behavior. Without caspase-LOV, Wld<sup>S</sup> expression in c4da neurons slightly  
364 increased the number of dendrite tips of c4da neurons in the wandering larvae (*Figure 8A,B*) but  
365 did not change their response time or the percentage of non-responders in the thermal nocifensive  
366 behavior (*Figure 8C,D*). We then examined the thermal nocifensive behavior of wandering larvae  
367 expressing caspase-LOV along with UAS-mIFP-2A-HO1 (control) or UAS-Wld<sup>S</sup> (Wld<sup>S</sup>). With  
368 chronic low-level caspase-LOV activity in the dark, Wld<sup>S</sup> expression resulted in longer and more  
369 numerous dendrite tips but with a smaller percentage of territory covered by dendrites (*Figure*  
370 *8E,F*). Moreover, Wld<sup>S</sup> partially rescue the caspase-3 induced impairment in thermal nocifensive  
371 behavior. Wld<sup>S</sup> expression in c4da neurons reduced the averaged time to respond to a 46°C heat

372 probe (**Figure 8G**). It also reduced the percentage of non-responders in larvae expressing caspase-  
373 LOV and kept in the dark (**Figure 8H**). These findings indicate that Wld<sup>S</sup> expression in c4da  
374 neurons not only afforded preservation in dendrite structures but also protected neuronal functions  
375 critical for behavioral response to nociceptive stimuli.

376 While knockdown of dSarm1 or Axed did not affect dendrite structure of c4da neurons in  
377 the wandering larvae (**Figure 9A,B**), dSarm1 knockdown delayed the behavioral response to  
378 contacts with a probe heated to 46°C (**Figure 9C**). Knockdown of either dSarm1 or Axed increased  
379 the population of non-responders upon encounter with a probe at the nocifensive temperature of  
380 42°C (**Figure 9D**). With mild degeneration induced by the chronic low-level caspase-LOV activity  
381 in the dark throughout larval development, dSarm1 knockdown caused a small increase in the  
382 percentage of territory covered by c4da neuron dendrites in the wandering larvae (**Figure 9E,F**),  
383 while RNAi knockdown of Axed did not affect the degeneration of dendrite structure (**Figure**  
384 **9E,F**). Notably, knockdown of dSarm1 or Axed reduced the thermal nocifensive behavior of  
385 larvae with caspase-3 induced neurodegeneration (**Figure 9G,H**). Larvae with dSarm1 knockdown  
386 in c4da neurons took longer to avoid the probe heated to 42°C (**Figure 9G**). Knockdown of dSarm1  
387 or Axed in c4da neurons increased the percentage of non-responders when stimulated with a probe  
388 heated to 42°C or 46°C (**Figure 9H**). These results indicate that knockdown of dSarm1 or Axed in  
389 c4da neurons impaired the thermal nocifensive behavior of larvae during development and further  
390 exasperated the deficient thermal nocifensive behavior owing to caspase-3 induced degeneration  
391 of c4da neurons.

392

## 393 **DISCUSSION**

394 In this study, we established a new neurodegeneration and repair assay system with the photo-  
395 switchable caspase-3, caspase-LOV, to elucidate the mechanisms underlying dendrite  
396 degeneration and repair. To characterize the caspase-3 induced neurodegeneration, we focused on  
397 the dendrite morphology for different classes of da neurons and observed cell type-specific cellular  
398 responses. We also examined the c4da neurons-mediated thermal nocifensive behavior to reveal  
399 the functional consequence of neurodegeneration. We found that Wld<sup>S</sup>, a key molecule involved  
400 in the Wallerian axon degeneration, can protect dendrite structure and reduce the impairment of  
401 thermal nocifensive behavior caused by caspase-LOV activation in c4da neurons. Knockdown of  
402 dSarm1 reduced the caspase-3 induced loss in dendrite structure, whereas knockdown of Axed did

403 not affect dendrite degeneration. Knockdown of *dSarm1* or *Axed* led to impaired thermal  
404 nocifensive behavior with or without caspase-3 induced degeneration of *c4da* neurons. Along with  
405 the previously established laser severing injury model, our new model with adjustable caspase-  
406 LOV activation provides a useful platform to identify regulators and to improve our understanding  
407 of dendrite degeneration and repair.

408

### 409 **Cell type-specific cellular responses upon caspase-3 induced dendrite degeneration**

410 We examined how three different classes of *da* neurons react to caspase-LOV activation and found  
411 cell type-specific responses to caspase-3 induced dendrite degeneration. Dendrites of *c1da*, *c3da*  
412 and *c4da* neurons all exhibit more severe degeneration following longer duration of caspase-LOV  
413 activation. The survival rates of these three classes of *da* neurons also decreased with longer  
414 caspase-LOV activation. However, these *da* neurons differ in the dynamic dendrite changes over  
415 the 24-72 h period following illumination. Remarkably, *c1da* neurons displayed an increased  
416 percentage of added dendrite tips number following 30 min but not 2 h of caspase-LOV activation  
417 compared to neurons kept in the dark. This reactivation of the growth program is exhibited by *c1da*  
418 neurons but not *c3da* or *c4da* neurons. The *c3da* neurons continued to grow in dendrite length and  
419 tip numbers over the 24-72 h period following 30 min and 2 h of caspase-LOV activation, as  
420 control *c3da* neurons did. In contrast, caspase-LOV activation for 2 h induced significant changes  
421 in dendrite length and tip numbers in both *c1da* and *c4da* neurons. Unique to *c4da* neurons is an  
422 increase in the percentage of added dendrite tips with caspase-LOV activity in the dark.

423 Extensive studies in *da* neurons revealed the cell-type specific dendrite morphology, gene  
424 expressions, dendrite remodeling and injury responses (Grueber et al., 2002; Jan and Jan, 2010;  
425 Shimono et al., 2009; Song et al., 2012; Thompson-Peer et al., 2016). Our data further suggest that  
426 different classes of *da* neurons are also equipped with specialized mechanism to handle caspase-3  
427 induced neurodegeneration. By including different classes of *da* neurons in our study, we aim for  
428 a more comprehensive survey of how to protect dendrites from degeneration and improve recovery  
429 of neuronal functions. For example, future studies of *c1da* neurons could elucidate the growth  
430 programs reactivated following degeneration and assess whether such programs can be transferred  
431 to other cell types. As to *c3da* neurons, it would be of interest to investigate how they can withstand  
432 the caspase-LOV activation without halting their growth.

433

434 **Protection afforded by Wld<sup>S</sup> may vary with the degree of neurodegeneration**

435 The Wallerian degeneration pathway important for axon degeneration serves as a prominent target  
436 for therapy. In this study, we focused on the impacts of neurodegeneration on dendrites, which  
437 together with axons are responsible for maintaining neuronal functions. Our study of the impact  
438 of caspase-3 induced neurodegeneration on dendrite morphology and thermal nocifensive behavior  
439 reveals intriguing involvement of the Wallerian degeneration pathway. We found that with 10-30  
440 min caspase-LOV activation, Wld<sup>S</sup> can partially rescue the caspase-3 induced deficiency in  
441 dendrite structure and neuronal survival. Wld<sup>S</sup> also afforded protection for the impaired dendrite  
442 structure and thermal nocifensive behavior caused by the chronic low-level caspase-LOV activity  
443 in the dark. Interestingly, with continuous activation of the photo-switchable caspase-3 via  
444 illumination for days, a much stronger perturbation employed in a previous study, Wld<sup>S</sup> fails to  
445 rescue the survival of flies with neuronal expression of caspase-LOV (Smart et al., 2017). This  
446 suggests that the ability of Wld<sup>S</sup> to provide protection may depend on the level of caspase-LOV  
447 activation in a neuron. Whether different mechanisms are used for dendrite degeneration or repair  
448 in neurons experiencing different levels of caspase-LOV activation is an interesting question that  
449 can be explored using this tunable neurodegeneration model in the future.

450

451 **Multiple roles of Wld<sup>S</sup> in caspase-3 induced degeneration and repair**

452 The preservation of neuronal function by Wld<sup>S</sup> following caspase-LOV activation may result from  
453 the retained dendrite structures and/or axons, or a complex combination of different factors. In this  
454 study, we did not examine the caspase-3 induced axon degeneration and repair. The axons of the  
455 da neurons project deep into the ventral nerve cord and connect with central neurons to form  
456 circuits required for the avoidance behavior. These axons form bundles, while the dendrite arbors  
457 of da neurons display readily discernible patterns. To study caspase-3 induced axon degeneration  
458 and repair, future studies could examine cell types more suitable for imaging the axon morphology  
459 with established axon-dependent functional readouts, such as wing neurons or olfactory receptor  
460 neurons (ORNs) (Neukomm et al., 2017; Osterloh et al., 2012).

461

462 **dSarm1 and Axed play different roles in dendrite development, caspase-3 induced dendrite**  
463 **degeneration, and the thermal nocifensive behavior**

464 With recent advances in the understanding of the Wallerian degeneration pathway, additional  
465 regulators have been identified, including dSarm1 and Axed. Studies in *Drosophila* and mice  
466 suggest that dSarm1 acts downstream of Wld<sup>S</sup> while Axed may be either downstream of dSarm1  
467 or involved in a separate pathway (Coleman and Höke, 2020; Neukomm et al., 2017; Osterloh et  
468 al., 2012; Sambashivan and Freeman, 2021). In this study, we examined the roles of dSarm1 and  
469 Axed in dendrites and found that their functions diverged from those of Wld<sup>S</sup> during dendrite  
470 development, caspase-3 induced dendrite degeneration, and the thermal nocifensive behavior.

471 Previous studies report that knockout of dSarm1 specifically in c4da neurons does not  
472 affect dendrite structure but can protect c4da neurons from injury and PS-induced dendrite  
473 degeneration in wandering larvae during late larval development (Ji et al., 2021). Knockout of  
474 Axed in c4da neurons partially affects dendrite degeneration induced by injury but does not alter  
475 the degeneration in response to PS exposure (Ji et al., 2021). In this study, we found that  
476 knockdown of dSarm1 but not Axed in c4da neurons led to longer dendrites during early dendrite  
477 development and following caspase-3 induced dendrite degeneration. However, reduced dSarm1  
478 expression in c4da neurons did not protect them against caspase-3 induced impairments in their  
479 dendrite structure and neuronal functions later in the development during the wandering stage. At  
480 the behavioral level, we found that knockdown of dSarm1 or Axed in c4da neurons of control  
481 larvae with or without caspase-LOV impaired the thermal nocifensive behavior. Thus, dSarm1 and  
482 Axed affect c4da neurons-mediated thermal nocifensive behavior of larvae without altering  
483 dendrites of c4da neurons.

484

#### 485 **Functions of dSarm1 and Axed in other *Drosophila* neurons and in mammalian neurons**

486 Apart from c4da neurons, roles of dSarm1 and Axed in dendrite morphology and neuronal  
487 functions in other cell types have been described. Sarm1 knockdown in cultured hippocampal  
488 neurons or in mice results in simplified dendrite structure instead of longer dendrites as we  
489 observed in c4da neurons (Chen et al., 2011). In the mushroom body gamma neurons of the fly  
490 central nervous system, dSarm1 and Axed mutations do not affect dendrite pruning (Neukomm et  
491 al., 2017; Osterloh et al., 2012). For the behavioral functions, Sarm1 knockdown in mice causes  
492 deficiency in associative memory, cognitive flexibility and social interactions (Lin and Hsueh,  
493 2014), whereas flies containing dSarm1 or Axed mutant Johnston's organ (JO) clones can still  
494 elicit JO neurons-mediated grooming behavior (Neukomm et al., 2017). It thus appears that the



495 functions of these proteins may vary with their subcellular localization, the cell types, the time in  
496 development, as well as the species.

497

### 498 **Advantages of the new model for caspase-3 induced neurodegeneration**

499 The range of dendrite degeneration and repair resulting from varying degrees of caspase-LOV  
500 activation demonstrates the versatility of the photo-switchable caspase-3 system to induce  
501 degeneration in *Drosophila* da neurons. This new model has several strengths. First, with photo-  
502 switchable caspase-3, the timing and degree of degeneration can be controlled by adjusting the  
503 length and intensity of illumination. The activation of caspase-LOV lasts for the duration of the  
504 illumination and is reversible. In conjunction with the genetic tools available, we could induce  
505 degeneration in specific cell types. Finer spatial control may be achieved by locally illuminating  
506 certain areas of the cell viewed under the microscope or by targeting the photo-switchable caspase-  
507 3 with linked peptide sequences to specific subcellular compartments. Second, in contrast to laser  
508 severing of dendrites, the photo-switchable caspase-3 allows for infliction of neuronal injury  
509 systematically in a way that is considerably less labor intensive. It is thus amenable to screens of  
510 genetic manipulations or pharmacological drug libraries to dissect the underlying cellular and  
511 molecular mechanisms. Third, this model is physiologically relevant, given that caspase-3 plays a  
512 role in the developmental pruning of axon and dendrite (Kuo et al., 2006; Williams et al., 2006;  
513 Schoenmann et al., 2010) as well as axon degeneration initiated by trophic factor withdrawal  
514 (Nikolaev et al., 2009; Schoenmann et al., 2010, Simon 2012). The discoveries made possible with  
515 the photo-switchable caspase-3 system will therefore be likely to yield information about  
516 physiologically relevant neurodegeneration that occurs during developmental pruning, trophic  
517 factor withdrawal, and disease. Our model can complement the existing injury models, including  
518 laser ablation-induced dendrite degeneration and PS-induced dendrite degeneration (Sapar et al.,  
519 2018; Tao and Rolls, 2011) and provide an alternative route to study how to repair dendrites  
520 following neurodegeneration. It is currently unclear whether neurons respond to different insults  
521 the same way or whether insult-specific response pathways exist. In order to develop effective  
522 therapies, it is important to investigate how neurons respond to different types of injuries.

523

### 524 **Possible improvements of the new model**

525 In this study, we set up a degeneration and repair model for larval sensory neurons. The repair  
526 process identified in the larval sensory neurons could be a combination of developmental growth  
527 and a repair response specific to caspase-3 induced degeneration. To focus on the contribution  
528 from the repair process and to identify ways to re-establish the growth capacity of neurons, it is  
529 desirable to extend the system to the adult sensory neurons. The adult sensory neurons reach  
530 maturity around 3 days after eclosion and have stabilized dendrite structure throughout adulthood  
531 (DeVault et al., 2018). Therefore, dendrite elongation or addition following caspase-3 induced  
532 degeneration in adult fly would correspond to regeneration and repair.

533 In this proof-of-principle initial study, transgenes and RNAis are expressed before caspase-  
534 LOV activation, so the effects could be due to prevention of damage or repair of damage. Future  
535 improvements for better temporal control could make use of either a pharmacologically controlled  
536 gene switch system or the temperature-sensitive GAL80 repressor (Gal80ts) (Nicholson et al.,  
537 2008; Zeidler et al., 2004). Whereas we focused on cell autonomous factors in this study, we  
538 recognized there are likely non-cell autonomous contributions from epidermal cells and glial cells  
539 (DeVault et al., 2018; Liu and Jan, 2020; Song et al., 2012; Yadav et al., 2019; Yin et al., 2021).  
540 Future studies of dendrite degeneration at different stages of development as well as adulthood  
541 may shed light on strategies to prevent neurodegeneration, to diagnose neurodegeneration early,  
542 and to develop drugs promoting neural recovery from injury and diseases.

543

## 544 **METHODS**

### 545 **Fly stocks and genetics**

546 Animals were reared at 25°C or at 22°C for monitoring the dendrite degeneration and repair. The  
547 fly strains used in this study were as follows: UAS-Wld<sup>S</sup> (a generous gift from Ashley Smart at  
548 UCSF (Hoopfer et al., 2006)), Gal4<sup>19-12</sup> (Xiang et al., 2010), Gal4<sup>2-21</sup> (Grueber et al., 2003a), ppk-  
549 Gal4 (Grueber et al., 2003b), ppk-CD4-tdGFP (Han et al., 2011), UAS-caspase-LOV (BL76355,  
550 a generous gift from Ashley Smart at UCSF), UAS-tdTomato (Han et al., 2011), UAS-mIFP-T2A-  
551 HO1 (attp40 on 2<sup>nd</sup> chromosome used in this study. a generous gift from Xiaokun Shu, UCSF),  
552 UAS-luciferase (BL35788, control RNAi for the TRiP lines) UAS-dSarm1-RNAi (BL 63525),  
553 UAS-Axed-RNAi (BL 62989). The RNAi lines we used in the study are all VALIUM20-series  
554 TRiP RNAi fly stocks that produce short hairpin RNAs (shRNAs) and give stronger knockdown  
555 efficiency than VALIUM10-series TRiP RNAi flies (Ni et al., 2011). The tester lines for RNA

556 interference (RNAi) or overexpression experiments was ppk-gal4, ppk-CD4-tdGFP; UAS-  
557 caspase-LOV. RNAi or overexpression experiments were performed by crossing the tester lines to  
558 the variety of transgenic fly strains. To control for caspase-LOV expression dosage in different  
559 genotypes, we used UAS-mIFP-T2A-HO1 (wild-type, w<sup>1118</sup>) as control for Wld<sup>S</sup> experiments and  
560 UAS-luciferase (yv flies) as control for RNAi experiments. We found slight differences for  
561 thermal nocifensive behavior in genotypes, so we used different fly strains as controls for Wld<sup>S</sup>  
562 and RNAi lines.

563

### 564 **Illumination box with LED strips**

565 We collect eggs laid in the dark for 2 h and kept them in the dark at 25°C until illuminated at 48 h  
566 after egg laying (AEL). To activate the photo-switchable caspase-3, freely moving larvae were  
567 picked and transferred the transparent agar plates with a thin layer of yeast. Larvae were moved  
568 back to yeasted grape plate and kept in the dark at 22°C after different durations of blue LED  
569 illumination. Lower raising temperature to 22°C can delay development and increase the temporal  
570 resolution of the repair process following caspase-3 activation. To avoid lights, grape juice plates  
571 are store in 10 mm petri dishes wrapped with foil. A homemade 40 cm x 10 cm x 15 cm carbon  
572 box was used to shield larvae from ambient light and to house three 10cm long and 8mm wide  
573 Blue 3528 LED strip, (peak at 460nm, Environmental Lights) stick on the ceiling of the box in  
574 parallel and connected by wires. LED strips are wired to a connector with DC jack (Environmental  
575 Lights) and then a LED Power Supply Adapter (HitLights). The power of the light 15 cm away  
576 from the LED strips, where larvae were kept, is 0.91 mW/cm<sup>2</sup>.

577

### 578 ***In vivo* time lapse imaging**

579 Live imaging was performed as described (Emoto et al., 2006; Parrish et al., 2007). Larvae were  
580 anesthetized with diethyl-ether for 5-8 minutes (Acros Organics) before mounted in glycerol on  
581 top of a thin patch of agarose. After images were acquired using a Leica SP5 microscope with a  
582 20X oil objective (NA 0.75), larva was returned to yeasted grape juice agar plates or sacrificed if  
583 this is the end of imaging timepoints. Sum slices for Z-projection were generated using ImageJ  
584 software and used for dendrite structure prediction as described later.

585 To visualize neurons, c4da ddaC neurons were labeled by expressing UAS-CD4-tdTOM  
586 using the ppk-GAL4 driver or by using the direct fusion line ppk-tdGFP. C1da ddaE neurons are

587 visualized through mCD4-tdTOM driven by Gal4<sup>2-21</sup>. C3da ddaF neuron with UAS-CD4-tdTOM  
588 driven by the GAL4<sup>19-21</sup> along with Repo-Gal80 to eliminate the expression in glial cells (Awasaki  
589 et al., 2008; Xiang et al., 2010)

590

### 591 **Deep learning based-automatic dendrite structure prediction**

592 We utilized two methods to segment the dendrite structures of the da neurons for morphological  
593 quantification. For ddaE, c1da neurons, and ddac, c4da neurons, in Figure 1, we reconstructed  
594 individual neurons using Vaa3D-Neuron 2.0: 3D neuron paint and tracing function in Vaa3D  
595 (<http://vaa3d.org/>) with manual correction and validation of the tracing (Peng et al., 2010).

596 For the rest of ddaC neurons in this study, we established a U-Net based deep learning  
597 model for automatic dendrite structure segmentation which produces segmentation maps with  
598 pixel intensity representing the probability of dendrite structure. We followed the U-Net  
599 architecture specified in the original study (Ronneberger et al., 2015) with modifying the channel  
600 number of the final segmentation map from 2 to 1 since we only predicted dendrite structure versus  
601 background. Each training data consisted of a maximum intensity Z-projection image of one  
602 neuron manually cropped by drawing a ROI, paired with the manually segmented dendrite  
603 structure (mask) generated using the plugin, “simple neurite tracer”, in ImageJ. In total, we  
604 generated 29 sets of image-mask pairs for training and 8 sets for validation with datasets generated  
605 in-house. Two data augmentation strategies were used to increase the model robustness. First, an  
606 area of 512x512 pixels was randomly cropped from each input 1024x1024 training image and the  
607 associated mask. Then the cropped image and mask were randomly flipped horizontally and  
608 vertically with probability 0.5. We used the sum of binary cross-entropy and Dice loss (defined as  
609  $1 - \text{Dice coefficient}$ ) as the loss function and trained the model with Adam optimizer at learning  
610 rate  $1e-4$  for 500 epochs. The best model evaluated by Dice loss using the validation dataset was  
611 chosen for the downstream analysis. Our best model achieved the Dice loss at 0.13 and 0.16 for  
612 training and validation datasets, respectively.

613 A threshold of 0.5 was used to binarize segmentation maps generated by the model. We  
614 found high correlation ( $R^2 = 0.98$ ) in total dendrite length of larval neurons between model-  
615 predicted segmentation and manual reconstruction, while tip numbers only showed moderate  
616 correlation ( $R^2 = 0.45$ ). This was because tip number was more sensitive to the discontinuity and  
617 small fragments occasionally found in model-predicted segmentation masks. Therefore, we

618 included a 3-step post-processing procedure to exclude small fragments and reduce the  
619 discontinuity in the segmented dendrite structure. First, small objects with area less than 10 pixels  
620 were discarded. Second, dilation with a cross-shaped structuring element (connectivity=1) was  
621 used to fill in the gaps. Finally, skeletonization using the *skeletonize* function from Python scikit-  
622 image package was applied to obtain the final segmentation for the downstream morphology  
623 quantification. With post-processing to fill in gaps and remove small fragments, we observed a  
624 dramatic increase in the correlation of tip numbers ( $R^2 = 0.97$ ) and a slight increase for total  
625 dendrite length ( $R^2 = 0.99$ ).

626 This system can be applied to predict the structures of other type of neurons either using  
627 the existing models or retain models with new set of training datasets. One limitation is to separate  
628 the individual neurons at the manual ROI selection step. For example, the Gal4<sup>19-12</sup> and Gal4<sup>2-21</sup>  
629 drivers sometimes have weak expression in surrounding neurons which is hard to separate. When  
630 the neurons are also well-marked by fluorescence proteins, they can be recognized by the  
631 prediction model and included as part of the c1da neurons which introduce false positive errors.  
632 Therefore, we did not use the model for the c1da neurons.

633

### 634 **Quantification of dendrite structure**

635 With the prediction model described above along with the post-processing python code, we can  
636 obtain the total dendrite length, total dendrite tip numbers and skeletal images of predicted dendrite  
637 structures. Using the skeletal images, we performed Sholl analysis of dendrite branches to  
638 determine the complexity of the dendrite structure. The crossing continuous circles were separated  
639 by 0.76 $\mu$ m on either manually traced or predicted dendrite arbors. To determine percentage of  
640 territory covered, we measured the area of dendrite arbor of neuron of interest covered and divided  
641 it to total area of the hemisegment of the body wall. The territory covered is measured using ROI  
642 selection tools in ImageJ. We defined a cell as “survived” if the average dendrite length (total  
643 dendrite length/total tip numbers) over 10  $\mu$ m for c4da neurons. For c3da and c1da neurons, we  
644 identified neurons with more than 2 dendrite tips (more than one dendrite branch) as survived. To  
645 reduce the batch-by-batch variations, we normalized the quantifications to the controls for each  
646 batch before combining all data. For comparison between different conditions, the number was  
647 normalized to the averaged number in dark (control). The results are normalized to the controls for  
648 each set of experiments before combining.

649

### 650 **Thermal nocifensive behavior**

651 For thermo-nociception using a local hot probe, a custom-built thermo-couple device was used to  
652 keep the applied temperature constantly at 42 or 46 °C as desired. Stage and density-controlled  
653 3rd instar wandering stage larvae were used. Freely moving larvae were touched with the hot probe  
654 on mid-abdominal segments until the execution of nociceptive rolling avoidance behavior.  
655 Animals were monitored under cell phone camera (Nokia 6.1) and the time it takes to initiate the  
656 rolling behavior for high temperature were counted with in 20 s. The animals that take longer than  
657 20 s to response were classified as no responders. The percentages of no responder were calculated  
658 by dividing numbers of no responders by numbers of total tested animals. Each genotype was  
659 tested multiple times on different days and data from all trials was combined.

660

### 661 **Software**

662 The code used for deep learning based automatic dendrite structure prediction is written in  
663 python/TensorFlow. We trained our model on a Quadro P5000 GPU with 16 GB RAM in a Dell  
664 Precision 7920 Tower with Dual Intel Xeon Gold 6136 CPUs (3.0/3.7GHz), having 12 cores and  
665 128 GB RAM. The operating system was Windows 10. We have tested our system on Mac and  
666 Windows operating system. The software package, training and example testing images are  
667 available on the GitHub repository ([https://github.com/chienhsiang/dendrite\\_U-Net](https://github.com/chienhsiang/dendrite_U-Net)).

668

### 669 **Statistical tests**

670 All data are presented as mean  $\pm$  standard error of the mean (SEM) based on at least three  
671 independent experiments. Data are considered significantly different when p values are less than  
672 0.05. Student's t test was used for comparisons of two groups. One-way ANOVA with Tukey's  
673 post hoc test was used for comparisons of multiple groups. The Kruskal-Wallis rank sum test with  
674 Dunn's post hoc test further adjusted by the Benjamini-Hochberg FDR method was used for  
675 multiple comparisons of nonparametric samples. Statistics analysis was performed and prepared  
676 using JASP (Version 0.14). All samples were prepared and analyzed in parallel.

677

### 678 **ACKNOWLEDGMENTS**

679 We would like to thank members of the Jan Lab for helpful discussions. We want to thank Jacob  
680 Jaszczak, Caitlin O'Brien, Liying Li, and Ashely Smart for critical reading and suggestions on the  
681 manuscript. We are grateful for Ashley Smart and Xiaokun Shu at UCSF for kindly sharing fly  
682 stocks with us. We are grateful for Caitlin O'Brien for providing the training datasets. Research  
683 reported in this publication was supported by the National Institute of Neurological Disorders and  
684 Stroke (R35NS097227 to YNJ). Yuh-Nung Jan and Lily Y. Jan are investigators at the Howard  
685 Hughes Medical Institute.

686

### 687 **COMPETING INTERESTS**

688 The authors declare no competing interests.

689

### 690 **REFERENCES**

- 691 Awasaki T, Lai S-L, Ito K, Lee T. 2008. Organization and Postembryonic Development of Glial  
692 Cells in the Adult Central Brain of *Drosophila*. *J Neurosci* **28**:13742–13753.  
693 doi:10.1523/JNEUROSCI.4844-08.2008
- 694 Babcock DT, Landry C, Galko MJ. 2009. Cytokine signaling mediates UV-induced nociceptive  
695 sensitization in *Drosophila* larvae. *Curr Biol CB* **19**:799–806.  
696 doi:10.1016/j.cub.2009.03.062
- 697 Chen C-Y, Lin C-W, Chang C-Y, Jiang S-T, Hsueh Y-P. 2011. Sarm1, a negative regulator of  
698 innate immunity, interacts with syndecan-2 and regulates neuronal morphology. *J Cell Biol*  
699 **193**:769–784. doi:10.1083/jcb.201008050
- 700 Coleman MP, Höke A. 2020. Programmed axon degeneration: from mouse to mechanism to  
701 medicine. *Nat Rev Neurosci* **21**:183–196. doi:10.1038/s41583-020-0269-3
- 702 Cotman CW, Su JH. 1996. Mechanisms of neuronal death in Alzheimer's disease. *Brain Pathol*  
703 **6**:493–506.
- 704 DeVault L, Li T, Izabel S, Thompson-Peer KL, Jan LY, Jan YN. 2018. Dendrite regeneration of  
705 adult *Drosophila* sensory neurons diminishes with aging and is inhibited by epidermal-  
706 derived matrix metalloproteinase 2. *Genes Dev* **32**:402–414. doi:10.1101/gad.308270.117
- 707 Eldadah BA, Faden AI. 2000. Caspase pathways, neuronal apoptosis, and CNS injury. *J*  
708 *Neurotrauma* **17**:811–29. doi:10.1089/neu.2000.17.811
- 709 Erturk A, Wang Y, Sheng M. 2014. Local pruning of dendrites and spines by caspase-3-dependent  
710 and proteasome-limited mechanisms. *J Neurosci* **34**:1672–88.  
711 doi:10.1523/JNEUROSCI.3121-13.2014
- 712 Gerdts J, Summers DW, Sasaki Y, DiAntonio A, Milbrandt J. 2013. Sarm1-mediated axon  
713 degeneration requires both SAM and TIR interactions. *J Neurosci Off J Soc Neurosci*  
714 **33**:13569–13580. doi:10.1523/JNEUROSCI.1197-13.2013
- 715 Gorczyca DA, Younger S, Meltzer S, Kim SE, Cheng L, Song W, Lee HY, Jan LY, Jan YN. 2014.  
716 Identification of Ppk26, a DEG/ENaC Channel Functioning with Ppk1 in a Mutually  
717 Dependent Manner to Guide Locomotion Behavior in *Drosophila*. *Cell Rep* **9**:1446–58.  
718 doi:10.1016/j.celrep.2014.10.034

- 719 Grueber WB, Jan LY, Jan YN. 2003a. Different levels of the homeodomain protein cut regulate  
720 distinct dendrite branching patterns of *Drosophila* multidendritic neurons. *Cell* **112**:805–  
721 18. doi:10.1016/s0092-8674(03)00160-0
- 722 Grueber WB, Jan LY, Jan YN. 2002. Tiling of the *Drosophila* epidermis by multidendritic sensory  
723 neurons. *Development* **129**:2867–78.
- 724 Grueber WB, Ye B, Moore AW, Jan LY, Jan YN. 2003b. Dendrites of distinct classes of  
725 *Drosophila* sensory neurons show different capacities for homotypic repulsion. *Curr Biol*  
726 **13**:618–26. doi:10.1016/s0960-9822(03)00207-0
- 727 Han C, Jan LY, Jan Y-N. 2011. Enhancer-driven membrane markers for analysis of  
728 nonautonomous mechanisms reveal neuron-glia interactions in *Drosophila*. *Proc Natl Acad*  
729 *Sci U S A* **108**:9673–9678. doi:10.1073/pnas.1106386108
- 730 Hertzler JI, Simonovitch SI, Albertson RM, Weiner AT, Nye DMR, Rolls MM. 2020. Kinetochore  
731 proteins suppress neuronal microtubule dynamics and promote dendrite regeneration. *Mol*  
732 *Biol Cell* **31**:2125–2138. doi:10.1091/mbc.E20-04-0237-T
- 733 Honjo K, Mauthner SE, Wang Y, Skene JHP, Tracey WD. 2016. Nociceptor-enriched genes  
734 required for normal thermal nociception. *Cell Rep* **16**:295–303.  
735 doi:10.1016/j.celrep.2016.06.003
- 736 Hoopfer ED, McLaughlin T, Watts RJ, Schuldiner O, O’Leary DDM, Luo L. 2006. Wlds  
737 protection distinguishes axon degeneration following injury from naturally occurring  
738 developmental pruning. *Neuron* **50**:883–895. doi:10.1016/j.neuron.2006.05.013
- 739 Hwang RY, Stearns NA, Tracey WD. 2012. The ankyrin repeat domain of the TRPA protein  
740 painless is important for thermal nociception but not mechanical nociception. *PLoS One*  
741 **7**:e30090. doi:10.1371/journal.pone.0030090
- 742 Hwang RY, Zhong L, Xu Y, Johnson T, Zhang F, Deisseroth K, Tracey WD. 2007. Nociceptive  
743 neurons protect *Drosophila* larvae from parasitoid wasps. *Curr Biol CB* **17**:2105–2116.  
744 doi:10.1016/j.cub.2007.11.029
- 745 Jan Y-N, Jan LY. 2010. Branching out: mechanisms of dendritic arborization. *Nat Rev Neurosci*  
746 **11**:316–328. doi:10.1038/nrn2836
- 747 Ji H, Sapar ML, Sarkar A, Wang B, Han C. 2021. Phagocytosis and self-destruction execute  
748 dendrite degeneration of *Drosophila* sensory neurons at distinct levels of NAD<sup>+</sup> reduction.  
749 *bioRxiv* 2020.06.26.173245. doi:10.1101/2020.06.26.173245
- 750 Kanaoka Y, Skibbe H, Hayashi Y, Uemura T, Hattori Y. 2019. DeTerm: Software for automatic  
751 detection of neuronal dendritic branch terminals via an artificial neural network. *Genes*  
752 *Cells Devoted Mol Cell Mech* **24**:464–472. doi:10.1111/gtc.12700
- 753 Khatri N, Gilbert JP, Huo Y, Sharaflari R, Nee M, Qiao H, Man HY. 2018. The Autism Protein  
754 Ube3A/E6AP Remodels Neuronal Dendritic Arborization via Caspase-Dependent  
755 Microtubule Destabilization. *J Neurosci* **38**:363–378. doi:10.1523/JNEUROSCI.1511-  
756 17.2017
- 757 Kim SE, Coste B, Chadha A, Cook B, Patapoutian A. 2012. The role of *Drosophila* Piezo in  
758 mechanical nociception. *Nature* **483**:209–212. doi:10.1038/nature10801
- 759 Kitatani Y, Tezuka A, Hasegawa E, Yanagi S, Togashi K, Tsuji M, Kondo S, Parrish JZ, Emoto  
760 K. 2020. *Drosophila* miR-87 promotes dendrite regeneration by targeting the  
761 transcriptional repressor Tramtrack69. *PLoS Genet* **16**:e1008942.  
762 doi:10.1371/journal.pgen.1008942
- 763 Kulkarni VA, Firestein BL. 2012. The dendritic tree and brain disorders. *Mol Cell Neurosci* **50**:10–  
764 20. doi:10.1016/j.mcn.2012.03.005



- 765 Kuo CT, Zhu S, Younger S, Jan LY, Jan YN. 2006. Identification of E2/E3 ubiquitinating enzymes  
766 and caspase activity regulating *Drosophila* sensory neuron dendrite pruning. *Neuron*  
767 **51**:283–90. doi:10.1016/j.neuron.2006.07.014
- 768 Kweon JH, Kim S, Lee SB. 2017. The cellular basis of dendrite pathology in neurodegenerative  
769 diseases. *BMB Rep* **50**:5–11.
- 770 Lin C-W, Hsueh Y-P. 2014. Sarm1, a neuronal inflammatory regulator, controls social interaction,  
771 associative memory and cognitive flexibility in mice. *Brain Behav Immun* **37**:142–151.  
772 doi:10.1016/j.bbi.2013.12.002
- 773 Liu H-H, Jan Y-N. 2020. Mechanisms of neurite repair. *Curr Opin Neurobiol* **63**:53–58.  
774 doi:10.1016/j.conb.2020.02.010
- 775 Lunn ER, Perry VH, Brown MC, Rosen H, Gordon S. 1989. Absence of Wallerian Degeneration  
776 does not Hinder Regeneration in Peripheral Nerve. *Eur J Neurosci* **1**:27–33.  
777 doi:10.1111/j.1460-9568.1989.tb00771.x
- 778 MacDonald JM, Beach MG, Porpiglia E, Sheehan AE, Watts RJ, Freeman MR. 2006. The  
779 *Drosophila* cell corpse engulfment receptor Draper mediates glial clearance of severed  
780 axons. *Neuron* **50**:869–881. doi:10.1016/j.neuron.2006.04.028
- 781 Mulherkar S, Firozi K, Huang W, Uddin MD, Grill RJ, Costa-Mattioli M, Robertson C, Tolia KF.  
782 2017. RhoA-ROCK Inhibition Reverses Synaptic Remodeling and Motor and Cognitive  
783 Deficits Caused by Traumatic Brain Injury. *Sci Rep* **7**:10689. doi:10.1038/s41598-017-  
784 11113-3
- 785 Nagel J, Delandre C, Zhang Y, Förstner F, Moore AW, Tavosanis G. 2012. Fascin controls  
786 neuronal class-specific dendrite arbor morphology. *Dev Camb Engl* **139**:2999–3009.  
787 doi:10.1242/dev.077800
- 788 Neukomm LJ, Burdett TC, Seeds AM, Hampel S, Coutinho-Budd JC, Farley JE, Wong J,  
789 Karadeniz YB, Osterloh JM, Sheehan AE, Freeman MR. 2017. Axon Death Pathways  
790 Converge on Axundead to Promote Functional and Structural Axon Disassembly. *Neuron*  
791 **95**:78-91.e5. doi:10.1016/j.neuron.2017.06.031
- 792 Ni J-Q, Zhou R, Czech B, Liu L-P, Holderbaum L, Yang-Zhou D, Shim H-S, Tao R, Handler D,  
793 Karpowicz P, Binari R, Booker M, Brennecke J, Perkins LA, Hannon GJ, Perrimon N.  
794 2011. A genome-scale shRNA resource for transgenic RNAi in *Drosophila*. *Nat Methods*  
795 **8**:405–407. doi:10.1038/nmeth.1592
- 796 Nicholson L, Singh GK, Osterwalder T, Roman GW, Davis RL, Keshishian H. 2008. Spatial and  
797 temporal control of gene expression in *Drosophila* using the inducible GeneSwitch GAL4  
798 system. I. Screen for larval nervous system drivers. *Genetics* **178**:215–34.  
799 doi:10.1534/genetics.107.081968
- 800 Nye DMR, Albertson RM, Weiner AT, Hertzler JI, Shorey M, Goberdhan DCI, Wilson C, Janes  
801 KA, Rolls MM. 2020. The receptor tyrosine kinase Ror is required for dendrite  
802 regeneration in *Drosophila* neurons. *PLoS Biol* **18**:e3000657.  
803 doi:10.1371/journal.pbio.3000657
- 804 Osterloh JM, Yang J, Rooney TM, Fox AN, Adalbert R, Powell EH, Sheehan AE, Avery MA,  
805 Hackett R, Logan MA, MacDonald JM, Ziegenfuss JS, Milde S, Hou YJ, Nathan C, Ding  
806 A, Brown RH, Conforti L, Coleman M, Tessier-Lavigne M, Zuchner S, Freeman MR. 2012.  
807 dSarm/Sarm1 is required for activation of an injury-induced axon death pathway. *Science*  
808 **337**:481–4. doi:10.1126/science.1223899

- 809 Parrish JZ, Xu P, Kim CC, Jan LY, Jan YN. 2009. The microRNA bantam functions in epithelial  
810 cells to regulate scaling growth of dendrite arbors in drosophila sensory neurons. *Neuron*  
811 **63**:788–802. doi:10.1016/j.neuron.2009.08.006
- 812 Penzes P, Cahill ME, Jones KA, VanLeeuwen J-E, Woolfrey KM. 2011. Dendritic spine pathology  
813 in neuropsychiatric disorders. *Nat Neurosci* **14**:285–293. doi:10.1038/nn.2741
- 814 Ronneberger O, Fischer P, Brox T. 2015. U-Net: Convolutional Networks for Biomedical Image  
815 Segmentation. *ArXiv150504597 Cs*.
- 816 Sambashivan S, Freeman MR. 2021. SARM1 signaling mechanisms in the injured nervous system.  
817 *Curr Opin Neurobiol* **69**:247–255. doi:10.1016/j.conb.2021.05.004
- 818 Sapar ML, Ji H, Wang B, Poe AR, Dubey K, Ren X, Ni J-Q, Han C. 2018. Phosphatidylserine  
819 Externalization Results from and Causes Neurite Degeneration in Drosophila. *Cell Rep*  
820 **24**:2273–2286. doi:10.1016/j.celrep.2018.07.095
- 821 Schoenmann Z, Assa-Kunik E, Tiomny S, Minis A, Haklai-Topper L, Arama E, Yaron A. 2010.  
822 Axonal Degeneration Is Regulated by the Apoptotic Machinery or a NAD<sup>+</sup>-Sensitive  
823 Pathway in Insects and Mammals. *J Neurosci* **30**:6375–6386.  
824 doi:10.1523/JNEUROSCI.0922-10.2010
- 825 Shimono K, Fujimoto A, Tsuyama T, Yamamoto-Kochi M, Sato M, Hattori Y, Sugimura K, Usui  
826 T, Kimura K, Uemura T. 2009. Multidendritic sensory neurons in the adult Drosophila  
827 abdomen: origins, dendritic morphology, and segment- and age-dependent programmed  
828 cell death. *Neural Dev* **4**:37. doi:10.1186/1749-8104-4-37
- 829 Simon DJ, Pitts J, Hertz NT, Yang J, Yamagishi Y, Olsen O, Tesic Mark M, Molina H, Tessier-  
830 Lavigne M. 2016. Axon Degeneration Gated by Retrograde Activation of Somatic Pro-  
831 apoptotic Signaling. *Cell* **164**:1031–45. doi:10.1016/j.cell.2016.01.032
- 832 Smart AD, Pache RA, Thomsen ND, Kortemme T, Davis GW, Wells JA. 2017. Engineering a  
833 light-activated caspase-3 for precise ablation of neurons in vivo. *Proc Natl Acad Sci U S A*  
834 **114**:E8174–E8183. doi:10.1073/pnas.1705064114
- 835 Song Y, Ori-McKenney KM, Zheng Y, Han C, Jan LY, Jan YN. 2012. Regeneration of Drosophila  
836 sensory neuron axons and dendrites is regulated by the Akt pathway involving Pten and  
837 microRNA bantam. *Genes Dev* **26**:1612–25. doi:10.1101/gad.193243.112
- 838 Stone MC, Albertson RM, Chen L, Rolls MM. 2014. Dendrite injury triggers DLK-independent  
839 regeneration. *Cell Rep* **6**:247–53. doi:10.1016/j.celrep.2013.12.022
- 840 Sugimura K, Yamamoto M, Niwa R, Satoh D, Goto S, Taniguchi M, Hayashi S, Uemura T. 2003.  
841 Distinct developmental modes and lesion-induced reactions of dendrites of two classes of  
842 Drosophila sensory neurons. *J Neurosci* **23**:3752–60.
- 843 Tao J, Rolls MM. 2011. Dendrites have a rapid program of injury-induced degeneration that is  
844 molecularly distinct from developmental pruning. *J Neurosci* **31**:5398–5405.  
845 doi:10.1523/JNEUROSCI.3826-10.2011
- 846 Thompson-Peer KL, DeVault L, Li T, Jan LY, Jan YN. 2016. In vivo dendrite regeneration after  
847 injury is different from dendrite development. *Genes Dev* **30**:1776–89.  
848 doi:10.1101/gad.282848.116
- 849 Tsubouchi A, Caldwell JC, Tracey WD. 2012. Dendritic filopodia, Ripped Pocket, NOMPC, and  
850 NMDARs contribute to the sense of touch in Drosophila larvae. *Curr Biol CB* **22**:2124–  
851 2134. doi:10.1016/j.cub.2012.09.019
- 852 Williams DW, Kondo S, Krzyzanowska A, Hiromi Y, Truman JW. 2006. Local caspase activity  
853 directs engulfment of dendrites during pruning. *Nat Neurosci* **9**:1234–6.  
854 doi:10.1038/nn1774

- 855 Williams DW, Truman JW. 2005. Cellular mechanisms of dendrite pruning in *Drosophila*: insights  
856 from in vivo time-lapse of remodeling dendritic arborizing sensory neurons. *Dev Camb*  
857 *Engl* **132**:3631–3642. doi:10.1242/dev.01928
- 858 Xiang Y, Yuan Q, Vogt N, Looger LL, Jan LY, Jan YN. 2010. Light-avoidance-mediating  
859 photoreceptors tile the *Drosophila* larval body wall. *Nature* **468**:921–6.  
860 doi:10.1038/nature09576
- 861 Xiong Y, Mahmood A, Chopp M. 2019. Remodeling dendritic spines for treatment of traumatic  
862 brain injury. *Neural Regen Res* **14**:1477–1480. doi:10.4103/1673-5374.255957
- 863 Yadav S, Younger SH, Zhang L, Thompson-Peer KL, Li T, Jan LY, Jan YN. 2019. Glial  
864 ensheathment of the somatodendritic compartment regulates sensory neuron structure and  
865 activity. *Proc Natl Acad Sci U S A* **116**:5126–5134. doi:10.1073/pnas.1814456116
- 866 Yan Z, Zhang W, He Y, Gorczyca D, Xiang Y, Cheng LE, Meltzer S, Jan LY, Jan YN. 2013.  
867 *Drosophila* NOMPC is a mechanotransduction channel subunit for gentle-touch sensation.  
868 *Nature* **493**:221–225. doi:10.1038/nature11685
- 869 Yin C, Peterman E, Rasmussen JP, Parrish JZ. 2021. Transparent Touch: Insights From Model  
870 Systems on Epidermal Control of Somatosensory Innervation. *Front Cell Neurosci*  
871 **15**:680345. doi:10.3389/fncel.2021.680345
- 872 Zeidler MP, Tan C, Bellaiche Y, Cherry S, Häder S, Gayko U, Perrimon N. 2004. Temperature-  
873 sensitive control of protein activity by conditionally splicing inteins. *Nat Biotechnol*  
874 **22**:871–876. doi:10.1038/nbt979
- 875 Zhong L, Hwang RY, Tracey WD. 2010. Pickpocket is a DEG/ENaC protein required for  
876 mechanical nociception in *Drosophila* larvae. *Curr Biol* **20**:429–34.  
877 doi:10.1016/j.cub.2009.12.057
- 878 Zou KH, Warfield SK, Bharatha A, Tempany CMC, Kaus MR, Haker SJ, Wells WM, Jolesz FA,  
879 Kikinis R. 2004. Statistical validation of image segmentation quality based on a spatial  
880 overlap index. *Acad Radiol* **11**:178–189. doi:10.1016/s1076-6332(03)00671-8  
881  
882  
883  
884  
885  
886  
887  
888  
889  
890  
891  
892  
893  
894  
895  
896  
897  
898  
899  
900

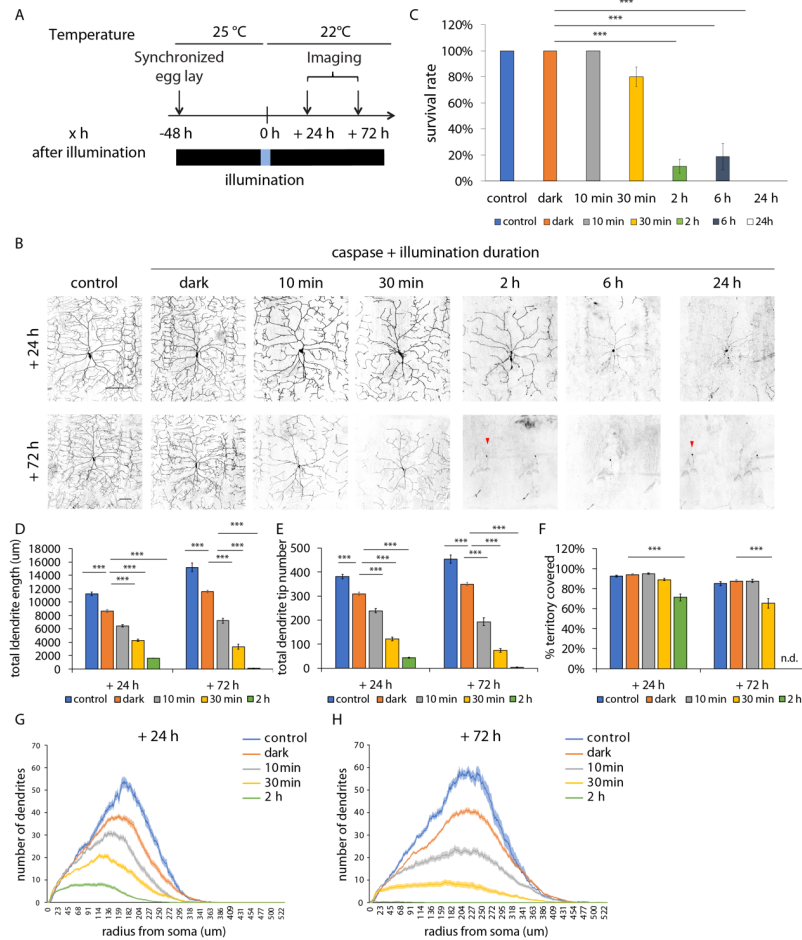

901  
 902 **Figure 1. Transient caspase-LOV activation initiates dendrite degeneration followed by repair in**  
 903 **c4da neurons.** (A) Protocol to illuminate and image larval c4da neurons expressing just UAS-tdTOM  
 904 (control) or UAS-tdTOM and UAS-caspase-LOV (dark, 10 min-24 h) using ppk-GAL4. These neurons  
 905 were labeled with tdTOM for visualization. Larvae were kept in the dark all the time (control, dark) or kept  
 906 in the dark and illuminated at 48 h after egg laying for 10 min-24 h. The same neurons were imaged twice  
 907 at 24 h and 72 h following illumination. (B) Representative images of c4da neurons from larva without  
 908 caspase-LOV and kept in the dark (control), with caspase-LOV and kept in the dark (dark), or with caspase-  
 909 LOV and illuminated for different durations (10 min-24 h). Neurons were imaged at 24 h (+24 h, top row)  
 910 and 72 h (+72 h, bottom row) after illumination started. (C) Survival rates of c4da neurons expressing  
 911 caspase-LOV decrease when illumination is extended. Survival of neurons was counted 72 h after  
 912 illumination. (D-F) Quantifications of dendrite structures of survived c4da neurons following caspase-LOV  
 913 activation, including total dendrite length (D), total dendrite tip numbers (E), and percentage of territory  
 914 covered (F). The skeletal dendrite structures were predicted by in-house built deep learning models. The  
 915 quantifications were carried out using a python script. (G-H) Sholl analysis of dendrite complexity 24 h (G)  
 916 and 72 h (H) after illumination. The complexity of the dendrite structure, quantified as numbers of dendrites  
 917 crossing continuous circles originated from the soma and represented by the total area under the curve,  
 918 decreases with caspase-LOV expression and progresses as illumination extends. All conditions are  
 919 significantly different from each other ( $p < 0.01$ ). Scale bars = 100  $\mu\text{m}$ . \*  $p < 0.05$ , \*\*  $p < 0.01$ , \*\*\*  $p < 0.001$ ,  
 920 Kruskal-Wallis rank sum test with Dunn's post hoc test further adjusted by the Benjamini-Hochberg FDR  
 921 method for multiple independent samples (C); one-way ANOVA with Tukey's post hoc test for multiple  
 922 comparisons in (D-H). Error bars represent  $\pm$  SEM (C-F) or in shaded area (G-H).  $n = 14-55$  neurons for  
 923 each experimental condition and timepoint.

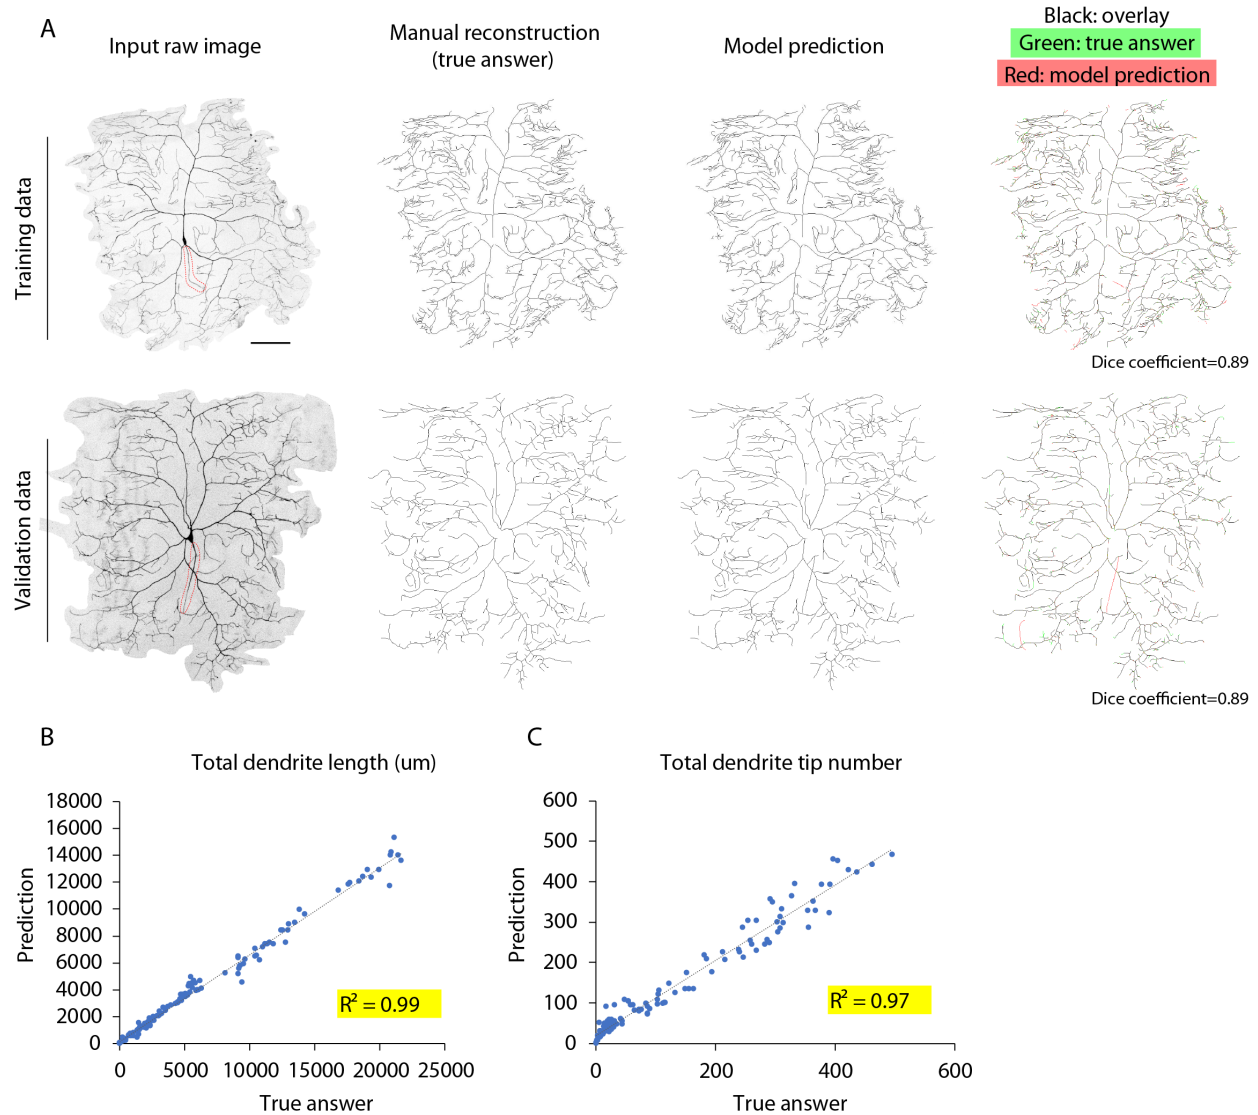

924  
 925  
 926  
 927  
 928  
 929  
 930  
 931  
 932  
 933  
 934  
 935  
 936  
 937  
 938  
 939  
 940

**Figure 1 – figure supplement 1. Deep learning-based automatic dendrite structure prediction.** (A) Our in-house trained deep learning-based model performed well in dendrite segmentation. In the top row are images of a representative neuron from the training dataset and the bottom row is a neuron from the validation dataset (novel neurons for the model). The first column contains input Z-projection image of neurons manually cropped by drawing a ROI. Images in the second column are manually segmented dendrite structure (true answer) from ImageJ plugin, “simple neurite tracer”. Our model predictions are in the third column. The last column has overlay images from true answer and model prediction. The model reliably recognized most of the arbors as human as most of the dendrites are matched (marked in black) with few distal dim dendrites omitted by the model and only shown in the true answer (green) or only recognized by the model (red). Our model did not differentiate between axons and dendrites and sometimes counts the axon (circled with red dash line in the first column) as one of the dendrites (7 out of 37 neurons in the training and validation dataset). (B-C) Relationships between manual reconstruction (true answer) and the deep learning model (prediction) for total dendrite length and total dendrite tip number. After post-processing, our prediction model achieved 0.99 for  $R^2$  of total dendrite length (B) and 0.97 for  $R^2$  of tip numbers (C). Scale bars =100  $\mu\text{m}$ . n = 160 neurons.

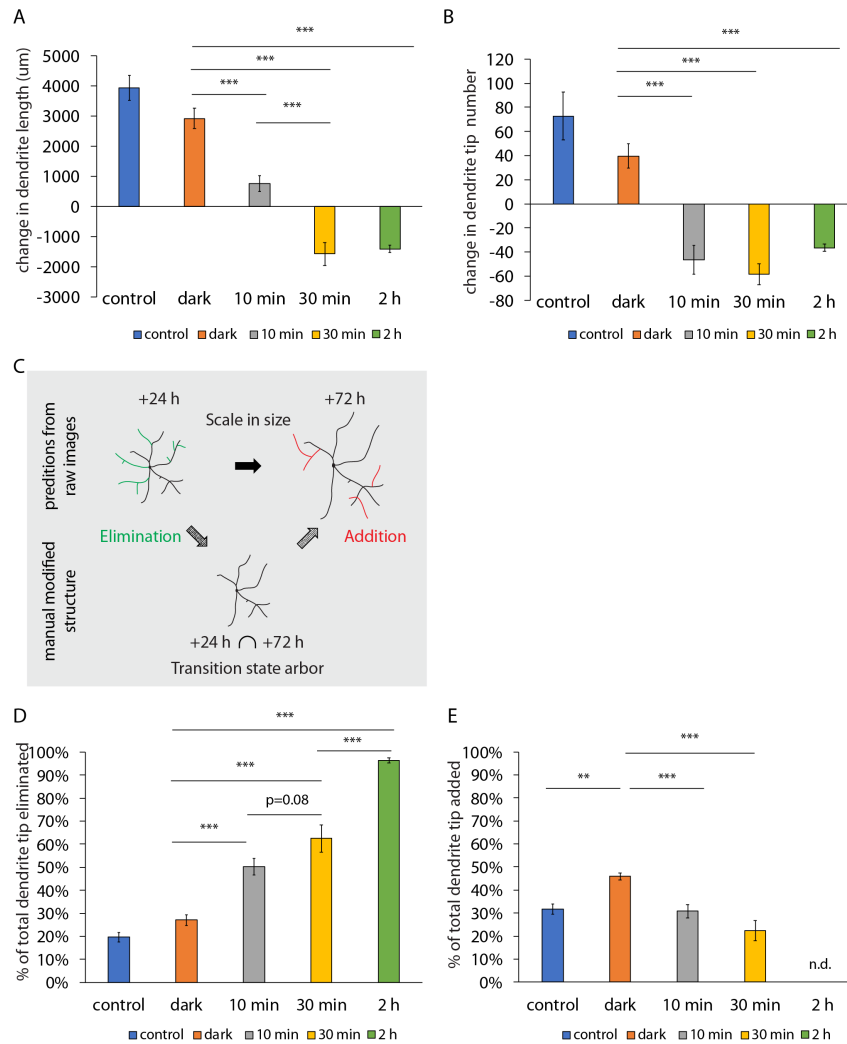

941  
 942 **Figure 2. Dendrite addition and elimination occurs simultaneously during the repair process.** (A-B)  
 943 Quantifications of changes in dendrite length (A) and dendrite tip numbers (B) of c4da neurons during the  
 944 24 h to 72 h time period after caspase-LOV activation. C4da neurons expressing caspase-LOV decrease  
 945 growth in dendrite length and dendrite tip numbers as illumination is extended (C) Illustration of elimination  
 946 and addition of dendrites happened over the degeneration and repair process. (D-E) Quantifications for the  
 947 percentage of eliminated (D) and added (E) dendrite tips over the 24 h to 72 h time period following  
 948 caspase-LOV activation. The percentage of tips eliminated increases with longer illumination while the  
 949 percentage of tips added decreases. \*  $p < 0.05$ , \*\*  $p < 0.01$ , \*\*\*  $p < 0.001$ , one-way ANOVA with Tukey's  
 950 post hoc test for multiple comparison in (A-B, D-E). Error bars represent  $\pm$  SEM.  $n = 19-23$  neurons for  
 951 each experimental condition and timepoint.

952  
 953  
 954  
 955  
 956  
 957  
 958  
 959

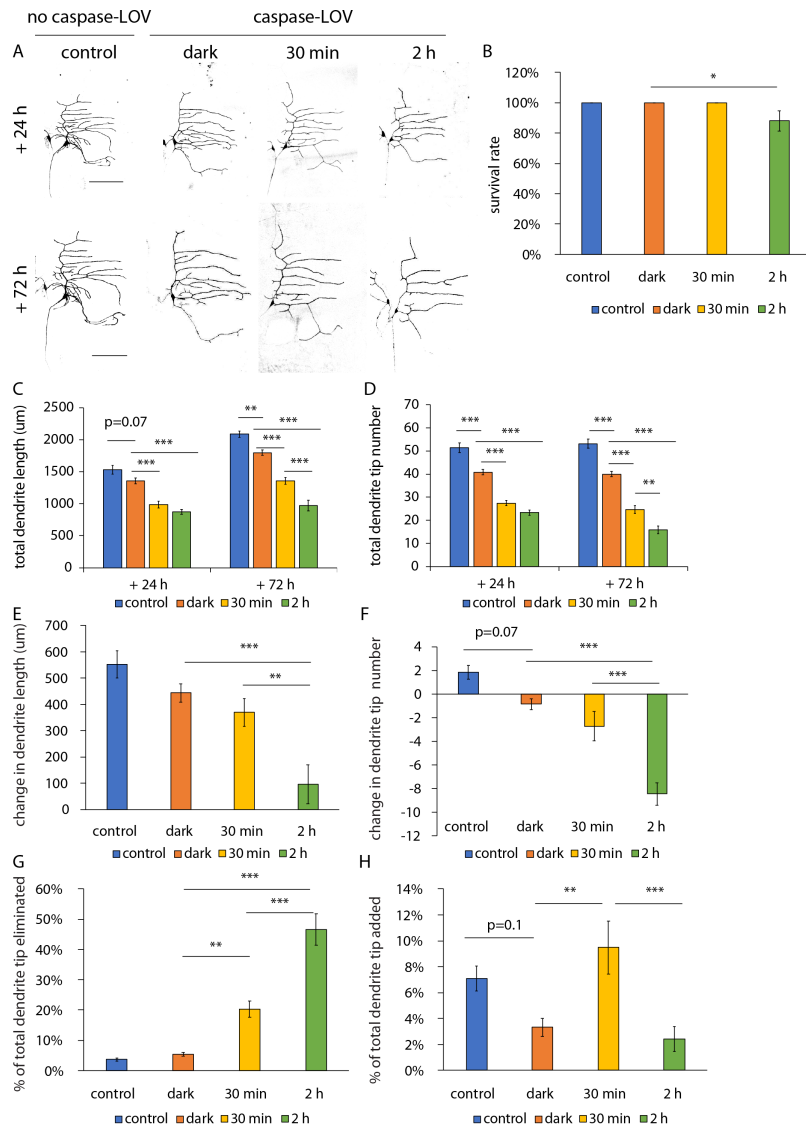

960  
 961 **Figure 3. Class I ddaE neurons can sustain mild caspase-LOV activation and repair by adding new**  
 962 **branches.** (A) Representative images of c1da neurons expressing just UAS-tdTOM (control) or UAS-  
 963 tdTOM and UAS-caspase-LOV (dark, 30 min, 2 h) driven by ppk<sup>2-21</sup>-GAL4. Larvae were kept in the dark  
 964 all the time (control, dark) or kept in the dark and illuminated for different durations (30 min, 2 h). The  
 965 same neurons were imaged at 24 h (top row) and at 72 h (bottom row) after illumination started. (B) Survival  
 966 rates of c1da neurons are reduced with 2h illumination. About 10% of c1da neuron imaged were found dead  
 967 72 h following 2 h caspase-LOV activation. (C-D) Quantifications of dendrite structures of c1da neurons  
 968 following caspase-LOV activation, including total dendrite length (C) and total dendrite tip numbers (D).  
 969 (E-F) Quantifications of changes in dendrite length (E) and tip numbers (F) of c1da neurons over the 24 h-  
 970 72 h time period after caspase-LOV activation. (G-H) Quantifications for the percentage of eliminated (G)  
 971 and added (H) dendrite tips over the 24 h-72 h time period following caspase-LOV activation. Scale bars  
 972 =100 µm. \* p<0.05, \*\* p<0.01, \*\*\* p<0.001, Kruskal-Wallis rank sum test with Dunn's post hoc test further  
 973 adjusted by the Benjamini-Hochberg FDR method for multiple independent samples (B); one-way ANOVA  
 974 with Tukey's post hoc test for multiple comparisons in (C-H). Error bars represent ± SEM. n = 22-28  
 975 neurons for each experimental condition and timepoint.

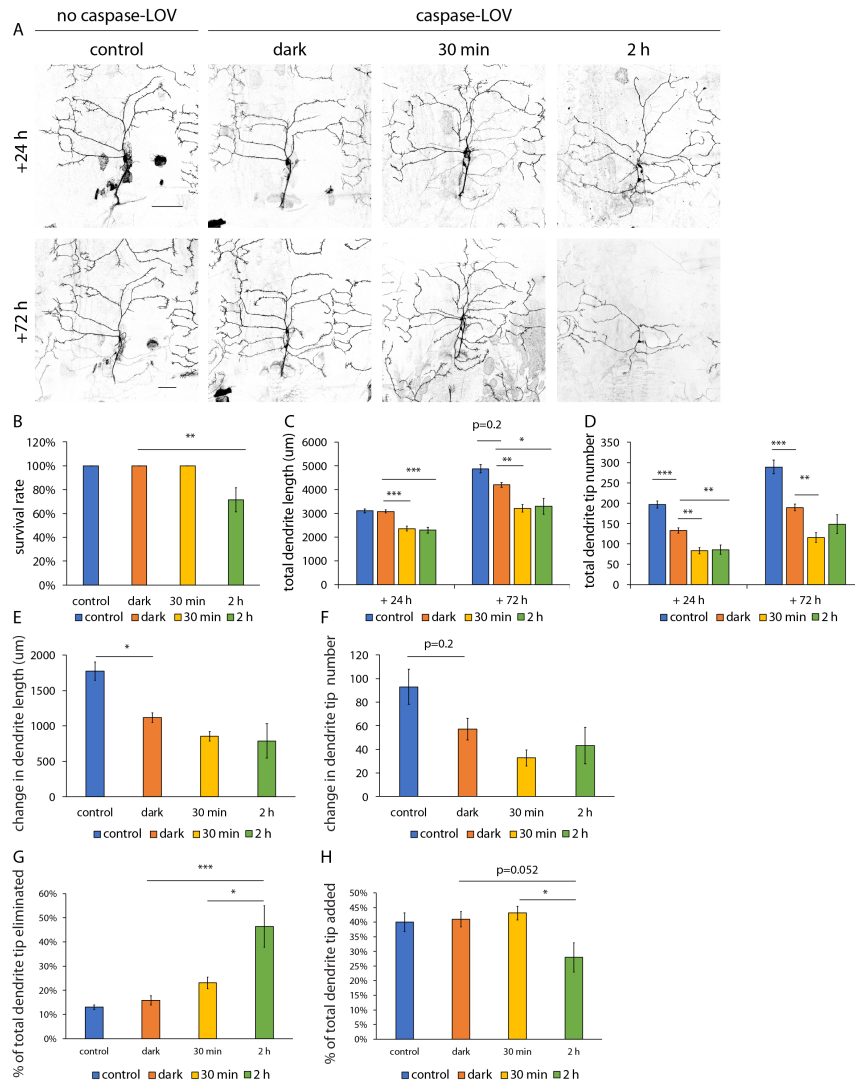

976

977 **Figure 4. Class III ddaF neurons can sustain mild caspase-LOV activation and repair by adding new**  
 978 **branches.** (A) Representative images of c3da neurons expressing just UAS-tdTOM (control) or UAS-  
 979 tdTOM and UAS-caspase-LOV (dark, 30 min, 2 h) driven by *ppk<sup>19-12</sup>-GAL4* along with *Repo-Gal80*.  
 980 Larvae were kept in the dark all the time (control, dark) or kept in the dark and illuminated for different  
 981 durations (30min, 2 h). The same neurons were imaged at 24 h (top row) and at 72 h (bottom row) after  
 982 illumination started. (B) Survival rates of c3da neurons are reduced with 2h illumination. (C-D)  
 983 Quantifications of dendrite structures of c3da neurons following caspase-LOV activation, including total  
 984 dendrite length (C) and total dendrite tip numbers (D). (E-F) Quantifications of change in dendrite length  
 985 (E) and tip numbers (F) of c3da neurons over the 24 h-72 h time period after caspase-LOV activation. (G-  
 986 H) Quantifications for the percentage of eliminated (G) and added (H) dendrite tips over the 24 h-72 h time  
 987 period following caspase-LOV activation. Scale bars = 100 μm. \*  $p < 0.05$ , \*\*  $p < 0.01$ , \*\*\*  $p < 0.001$ , Kruskal-  
 988 Wallis rank sum test with Dunn's post hoc test further adjusted by the Benjamini-Hochberg FDR method  
 989 for multiple independent samples (B); one-way ANOVA with Tukey's post hoc test for multiple  
 990 comparisons in (C-H). Error bars represent  $\pm$  SEM.  $n = 9-21$  neurons for each experimental condition and  
 991 timepoint.

992

993



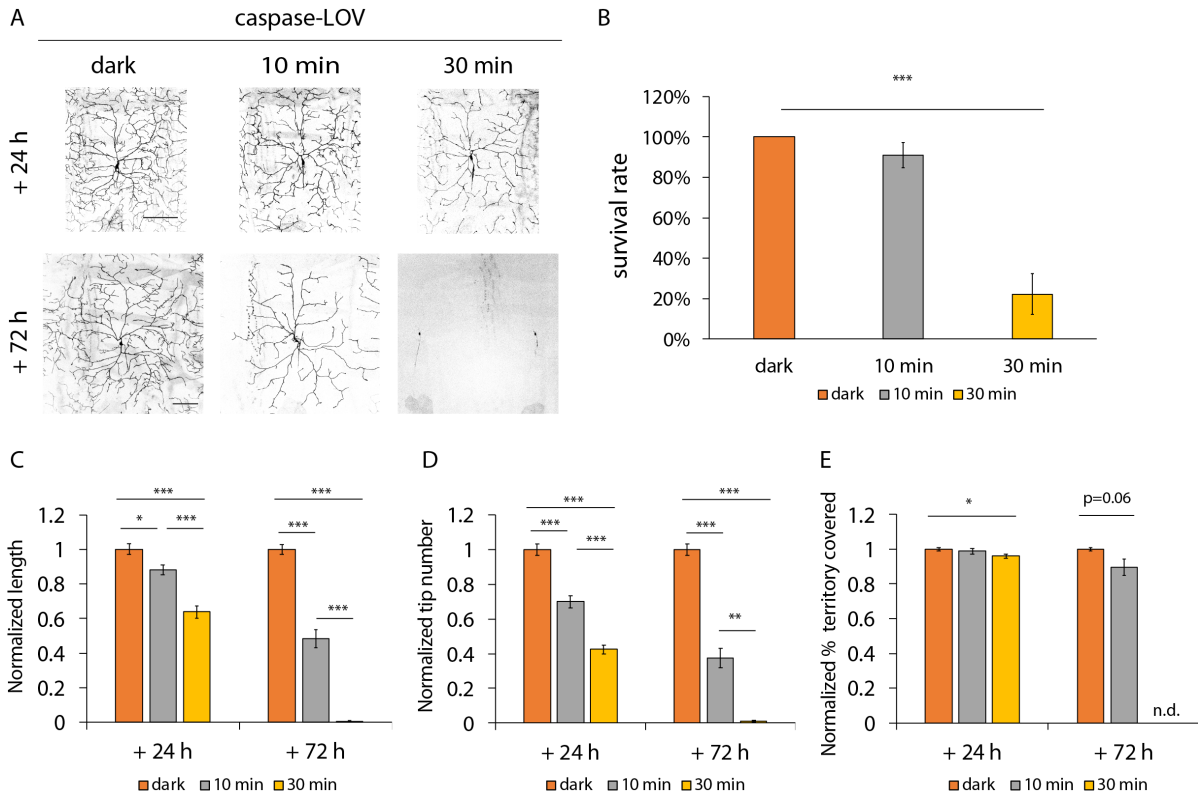

994  
995  
996  
997  
998  
999  
1000  
1001  
1002  
1003  
1004  
1005  
1006  
1007  
1008  
1009  
1010  
1011  
1012  
1013  
1014  
1015  
1016  
1017  
1018

**Figure 5 – figure supplement 1. Degeneration and repair in the c4da neurons of tester animals.** (A) Representative images of c4da neurons expressing UAS-luciferase and UAS-caspase-LOV driven by ppk-gal4 and labeled with ppk-tdGFP. Larvae were illuminated for 10 min or 30 min and imaged following the protocol in Fig. 1A. (B) Survival rates of c4da neurons decreased significantly upon 30 min illumination. (C-E) Quantifications of dendrite structures, including normalized length (C), normalized tip numbers (D), and normalized percentage of territory covered (E) of c4da neurons kept in the dark, illuminated for 10 min or illuminated for 30 min. The dendrite degeneration in the surviving c4da neurons is worse when illumination is extended. Scale bars = 100  $\mu$ m. \*  $p < 0.05$ , \*\*  $p < 0.01$ , \*\*\*  $p < 0.001$ , Kruskal-Wallis rank sum test with Dunn’s post hoc test further adjusted by the Benjamini-Hochberg FDR method for multiple independent samples (B); one-way ANOVA with Tukey’s post hoc test for multiple comparisons in (C-E). Error bars represent  $\pm$  SEM.  $n = 16-24$  neurons for each experimental condition and timepoint.

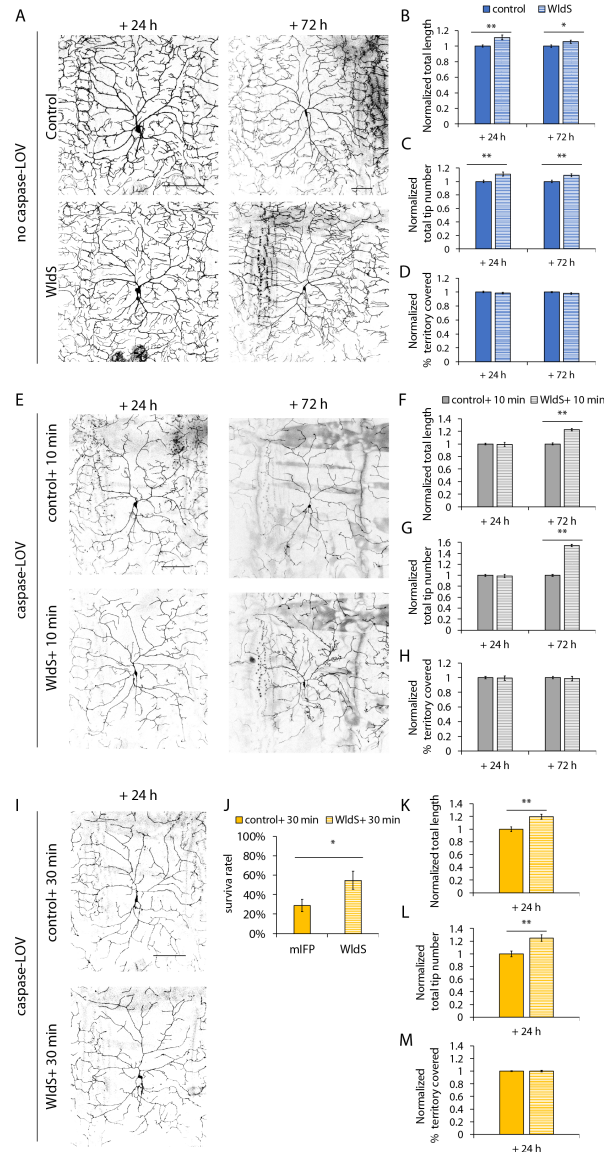

1019

1020

1021 **Figure 5. Wld<sup>S</sup> expressing neurons retain longer and more dendrites during development and upon**

1022 **caspase-3 induced neurodegeneration.** (A) Representative images of c4da neurons labeled by ppk-tdGFP

1023 with ppk-Gal4 driving expression of UAS-mIFP-2A-HO1 (control) or UAS-Wld<sup>S</sup> (Wld<sup>S</sup>). (B-D)

1024 Quantifications of dendrite structures, including normalized length (B), normalized tip numbers (C), and

1025 normalized percentage of territory covered (D) of c4da neurons. (E, I) Representative images of c4da

1026 neurons expressing ppk-tdGFP and caspase-LOV with UAS-mIFP-2A-HO1 (control) or UAS-Wld<sup>S</sup> driven

1027 by ppk-Gal4. Larva were kept in the dark and illuminated for 10 min (E) or 30 min (I) at 48 h after egg lay

1028 and imaged 24 h or 72 h afterward. (F-H) Quantifications of dendrite structures, including normalized

1029 length (F), normalized tip numbers (G), and normalized percentage of territory covered (H) of c4da neurons

1030 illuminated for 10 min. (J-M) Quantifications of survival rate (J) and dendrite structures, including

1031 normalized length (K), normalized tip numbers (L), and normalized percentage of territory covered (M) of

1032 c4da neurons illuminated for 30 min. Scale bars =100  $\mu$ m. \* p<0.05, \*\* p<0.01, \*\*\* p<0.001,

1033 Student's *t* test in (B-D, F-H, K-M), Kruskal-Wallis rank sum test with Dunn's post hoc test further adjusted

1034 by the Benjamini-Hochberg FDR method for multiple independent samples (J); Error bars represent  $\pm$  SEM.

n  $\geq$  29 neurons for each experimental condition and timepoint.

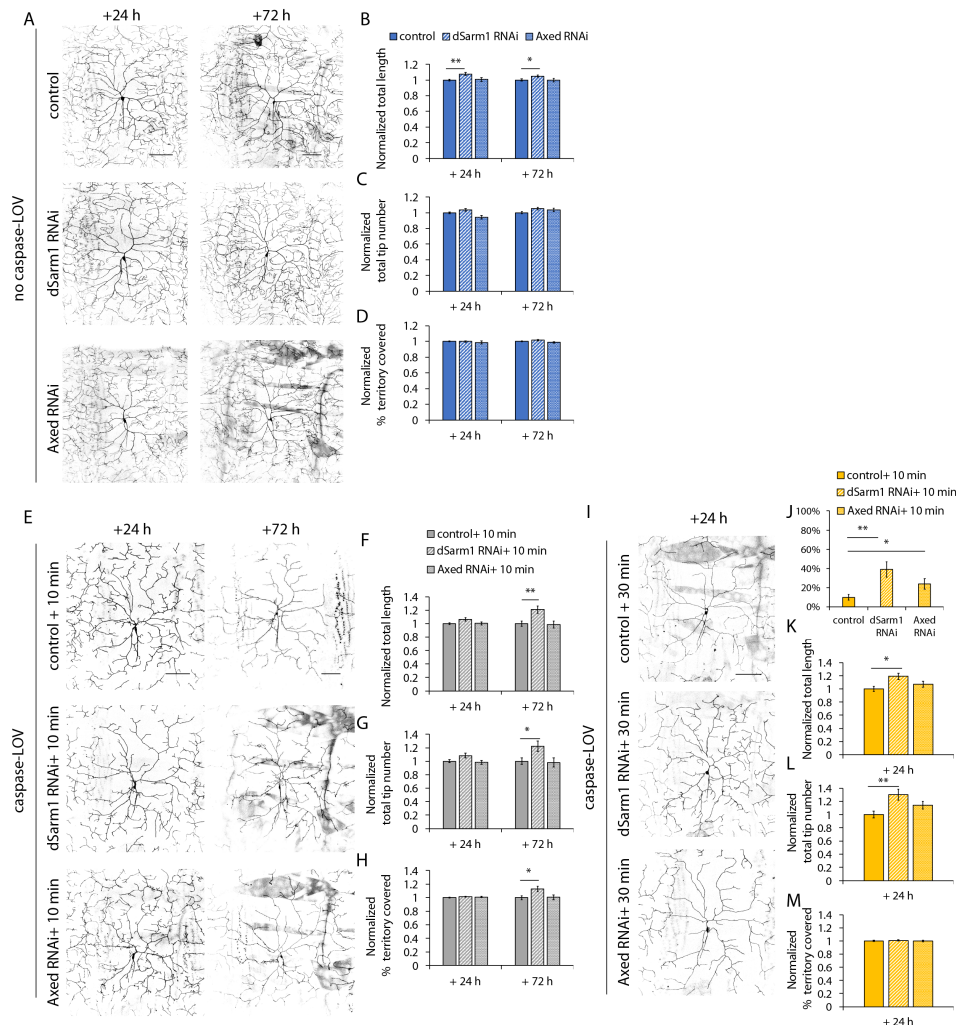

1035  
 1036 **Figure 6. dSarm1 knockdown improves neuronal survival and allows neurons to retain longer**  
 1037 **dendrites throughout development and upon caspase-3 induced degeneration, while Axed**  
 1038 **knockdown only increases neuronal survival.** (A) Representative images of c4da neurons labeled by ppk-  
 1039 tdGFP with ppk-Gal4 driving expression of UAS-luciferase (control), UAS-dSarm1 RNAi, or UAS-Axed  
 1040 RNAi. C4da neurons expressing dSarm1 RNAi have longer dendrites at early development (+ 24 h) and  
 1041 the dendrite length remains long until late development (+ 72 h). Knockdown of Axed in c4da neurons does  
 1042 not affect dendrite development. (B-D) Quantifications of dendrite structures, including normalized length  
 1043 (B), normalized tip numbers (C), and normalized percentage of territory covered (D) of c4da neurons. (E,  
 1044 I) Representative images of c4da neurons expressing ppk-tdGFP and UAS-caspase-LOV and UAS-  
 1045 luciferase (control), UAS-dSarm1 RNAi, or UAS-Axed RNAi driven by ppk-Gal4. Larva were kept in the  
 1046 dark and illuminated for 10 min (E) or 30 min (I) at 48 h after egg laying and imaged after 24 h or 72 h. (F-  
 1047 H) Quantifications of dendrite structures, including normalized length (F), normalized tip numbers (G), and  
 1048 normalized percentage of territory covered (H) of c4da neurons illuminated for 10 min. (J-M)  
 1049 Quantifications of survival rate (J) and dendrite structures, including normalized length (K), normalized tip  
 1050 numbers (L), and normalized percentage of territory covered (M), of c4da neurons illuminated for 30 min.  
 1051 Scale bars = 100  $\mu$ m. \*  $p < 0.05$ , \*\*  $p < 0.01$ , \*\*\*  $p < 0.001$ , one way ANOVA with Tukey's post hoc test for  
 1052 multiple comparison in (B-D, F-H, K-M), Kruskal-Wallis rank sum test with Dunn's post hoc test further  
 1053 adjusted by the Benjamini-Hochberg FDR method for multiple independent samples (J); Error bars  
 1054 represent  $\pm$  SEM.  $n \geq 29$  neurons for each experimental condition and timepoint.

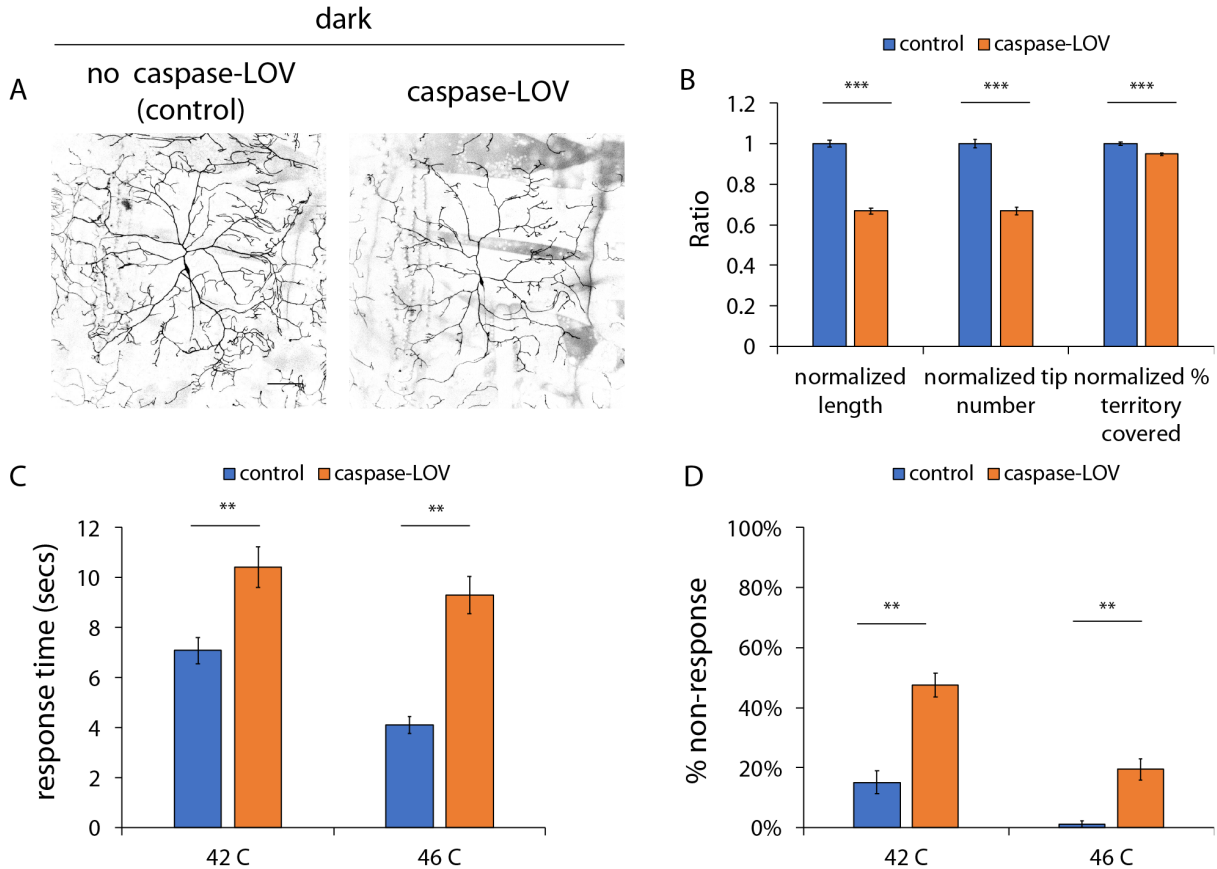

1055  
 1056 **Figure 7. Activation of caspase-LOV in c4da neurons impaired the thermal nociceptive behavior.** (A)  
 1057 Representative images of c4da neurons expressing UAS-tdTOM and UAS-luciferase (control) or UAS-  
 1058 tdTOM and UAS-caspase-LOV (caspase-LOV) driven by ppk-GAL4. Larvae are raised in the dark. C4da  
 1059 neurons expressing caspase-LOV have significant reductions in dendrite length, tip numbers and percentage  
 1060 of territory covered compared to control neurons at third-instar wandering stage. (B) Quantifications of  
 1061 dendrite structures, including normalized length (left), normalized tip numbers (middle), and normalized  
 1062 percentage of territory covered (right) of c4da neurons. (C-D) Aversive responses of third-instar wandering  
 1063 larvae in response to nocifensive temperature at 42°C and 46°C is affected by low-level caspase-LOV  
 1064 activation in the dark with longer response times (C) and a higher percentage of non-responders (D).  
 1065 Animals were classified as “non-responder” if the larva did not initiate the rolling behavior within 20 s of  
 1066 heated thermal probe touching the body wall. Scale bars =100  $\mu$ m. \*  $p < 0.05$ , \*\*  $p < 0.01$ , \*\*\*  $p < 0.001$ ,  
 1067 Student’s *t* test in (B-D). Error bars represent  $\pm$  SEM. B:  $n = 31$  (control) or 39 (caspase-LOV) neurons  
 1068 were tested. C-D:  $n \geq 85$  animals were tested for each genotype and temperature.

1069  
 1070  
 1071  
 1072  
 1073  
 1074  
 1075  
 1076  
 1077  
 1078

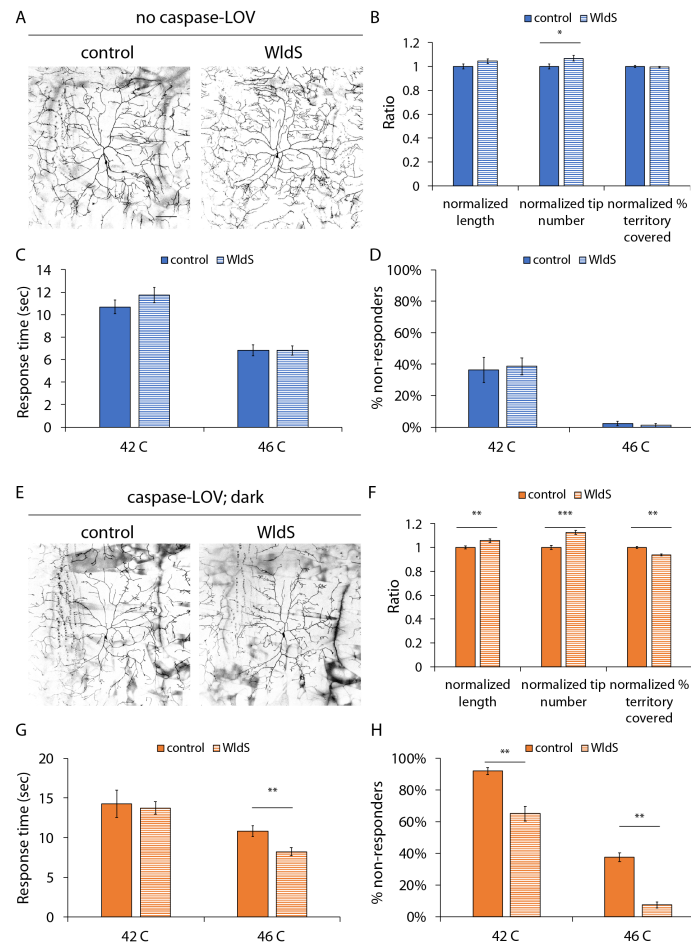

1079

1080 **Figure 8. Wld<sup>S</sup> can reduce caspase-3 induced dendrite degeneration and impairment in the thermal**  
 1081 **nocifensive behavior.** (A) Representative images of c4da neurons expressing tdTOM and UAS-mIFP-2A-  
 1082 HO1 (control) or UAS-tdTOM and UAS-Wld<sup>S</sup> (Wld<sup>S</sup>) driven by ppk-GAL4. Larvae are raised in the dark.  
 1083 C4da neurons expressing Wld<sup>S</sup> have significant increases in total dendrite tip numbers compared to control  
 1084 neurons during dendrite development at the third-instar wandering stage. (B) Quantifications of dendrite  
 1085 structures, including normalized length (left), normalized tip numbers (middle), and normalized percentage  
 1086 of territory covered (right) of c4da neurons. (C-D) Wld<sup>S</sup> expression on its own in c4da neurons does not  
 1087 change the response time (C) nor the percentage of animals that do not respond to nocifensive temperatures  
 1088 of 42°C and 46°C (D). (E) Representative images of c4da neurons expressing tdTOM, and caspase-LOV  
 1089 and UAS-mIFP-2A-HO1 (control) or UAS-tdTOM, UAS-caspase-LOV, and UAS-Wld<sup>S</sup> driven by ppk-  
 1090 GAL4. Larvae are raised in the dark. C4da neurons expressing Wld<sup>S</sup> can protect neurons from dendrite  
 1091 degeneration induced by low-level caspase-LOV activation in the dark as shown by significant increases in  
 1092 both dendrite length and tip numbers. There are reductions in the percentage of territory covered in Wld<sup>S</sup>  
 1093 expressing c4da neurons compared to control neurons. (F) Quantifications of dendrite structures, including  
 1094 normalized length (left), normalized tip numbers (middle), and normalized percentage of territory covered  
 1095 (right) of c4da neurons. (G-H) Slower thermal nocifensive response induced by caspase-3 can be partially  
 1096 rescued by expression of Wld<sup>S</sup> in c4da neurons. Wld<sup>S</sup> expression in animals with low-level caspase-LOV  
 1097 activation in the dark leads to a decreased response time (G) at 46°C and the lower percentage of non-  
 1098 responding animals (H) in response to nocifensive temperature at 42°C and 46°C. Scale bars =100 μm. \*  
 1099 p<0.05, \*\* p<0.01, \*\*\* p<0.001, Student's *t* test in (B-D, F-H). Error bars represent ± SEM. B, F: n ≥ 51  
 1100 neurons for each genotype. C-D, G-H: n ≥ 75 animals were tested for each genotype and temperature.

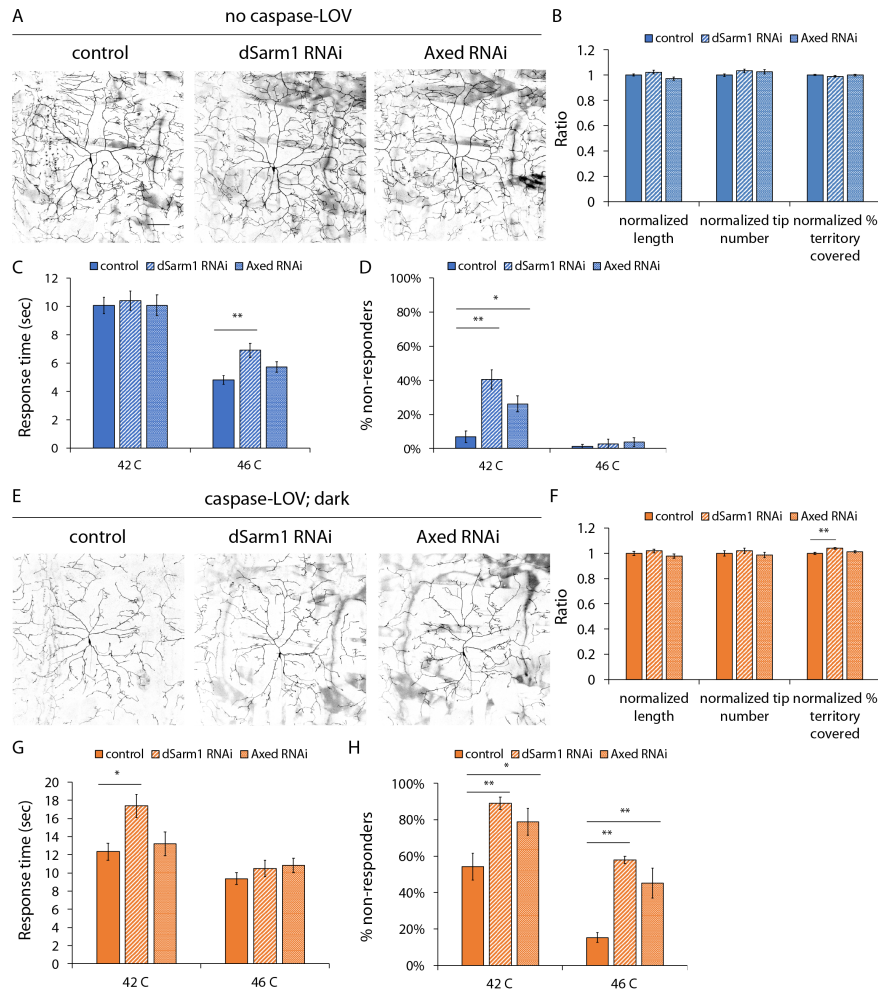

1101  
 1102 **Figure 9. Knockdown of dSarm1 or Axed reduces the thermal nocifensive behavior.** (A)  
 1103 Representative images of c4da neurons expressing UAS-tdTOM and UAS-luciferase (control), UAS-  
 1104 tdTOM and UAS-dSarm1 RNAi (dSarm1 RNAi), or UAS-tdTOM and UAS-Axed RNAi (Axed RNAi)  
 1105 driven by ppk-GAL4. Knockdown of dSarm1 or Axed by RNAi in c4da neurons does not change dendrite  
 1106 structures compared to control neurons during dendrite development at the third-instar wandering stage.  
 1107 All larvae are raised in the dark. (B) Quantifications of dendrite structures, including normalized length  
 1108 (left), normalized tip numbers (middle), and normalized percentage of territory covered (right) of c4da  
 1109 neurons. (C-D) Third-instar wandering larvae expressing dSarm1 RNAi in c4da neurons responded slower  
 1110 (C) and had a higher percentage of non-responding animals at 42°C (D). Knockdown of Axed also increases  
 1111 the percentage of animals with no response to 42°C (D). (E) Knockdown of dSarm1 or Axed by RNAi in  
 1112 c4da neurons does not change dendrite degeneration induced by caspase-LOV activation in the dark  
 1113 compared to control neurons at the third-instar wandering stage. (F) Quantifications of dendrite  
 1114 structures, including normalized length (left), normalized tip numbers (middle), and normalized percentage of territory  
 1115 covered (right) of c4da neurons. (G-H) Slower thermal nocifensive response induced by caspase-3 is worsen  
 1116 when dSarm1 and Axed are knocked down in c4da neurons. When dSarm1 expression is knocked down in  
 1117 these neurons, there is an increased response time at 42°C (G). When either dSarm1 or Axed are knocked  
 1118 down, there is a higher percentage of non-responding animals when probed at 42°C and at 46°C (H). Scale  
 1119 bars = 100  $\mu$ m. \*  $p < 0.05$ , \*\*  $p < 0.01$ , \*\*\*  $p < 0.001$ , one-way ANOVA with Tukey's post hoc test for multiple  
 1120 comparison in (B-D, F-H). Error bars represent  $\pm$  SEM. B, F:  $n \geq 44$  neurons for each genotype. C-D, G-H:  
 1121  $n \geq 72$  animals were tested for each genotype and temperature.
